# Supplementary material
Source: publisher site journal article supplement (https://www.dovepress.com/article/605625)
Supplement: Supplementary file 1 [file 605625%20Revised%20Supplementary%20Tables.pdf]

Table S1. Genes with  $P < 0.05$  in the cross-tissue association analysis.

| ENSE            | test_score | p_value  | p_fdr    | gene_name | seqnames | start    | end      |
|-----------------|------------|----------|----------|-----------|----------|----------|----------|
| ENSG0000007001  | 7.784757   | 0.000283 | 0.013576 | UPP2      | 2        | 1.59E+08 | 1.59E+08 |
| ENSG00000049759 | 3.280548   | 0.0446   | 0.049402 | NEDD4L    | 18       | 55711599 | 56068772 |
| ENSG00000052802 | 4.390411   | 0.019832 | 0.047068 | MSMO1     | 4        | 1.66E+08 | 1.66E+08 |
| ENSG00000056050 | 3.766792   | 0.031056 | 0.047068 | C4orf27   | 4        | 1.71E+08 | 1.71E+08 |
| ENSG00000068615 | 4.202707   | 0.01567  | 0.047068 | REEP1     | 2        | 86441116 | 86565206 |
| ENSG00000068654 | 2.874133   | 0.019911 | 0.047068 | POLR1A    | 2        | 86247339 | 86333278 |
| ENSG00000079134 | 5.610295   | 0.002751 | 0.02443  | THOC1     | 18       | 214520   | 268050   |
| ENSG00000079785 | 3.900412   | 0.016976 | 0.047068 | DDX1      | 2        | 15731302 | 15771235 |
| ENSG00000082438 | 3.39514    | 0.028323 | 0.047068 | COBLL1    | 2        | 1.66E+08 | 1.66E+08 |
| ENSG00000084764 | 4.180225   | 0.00967  | 0.040362 | MAPRE3    | 2        | 27193480 | 27250064 |
| ENSG00000085982 | 2.411805   | 0.044636 | 0.049402 | USP40     | 2        | 2.34E+08 | 2.34E+08 |
| ENSG00000099917 | 2.097086   | 0.037508 | 0.049402 | MED15     | 22       | 20850200 | 20941919 |
| ENSG00000099960 | 4.03484    | 0.024984 | 0.047068 | SLC7A4    | 22       | 21383007 | 21387129 |
| ENSG00000100053 | 3.159596   | 0.014797 | 0.047068 | CRYBB3    | 22       | 25595817 | 25603330 |
| ENSG00000100294 | 58.81351   | 0.013454 | 0.047068 | MCAT      | 22       | 43528212 | 43539400 |
| ENSG00000100297 | 4.939953   | 0.009534 | 0.040362 | MCM5      | 22       | 35796056 | 35821423 |
| ENSG00000100336 | 5.70874    | 0.00172  | 0.02443  | APOL4     | 22       | 36585172 | 36600886 |
| ENSG00000100348 | 3.72342    | 0.022056 | 0.047068 | TXN2      | 22       | 36863083 | 36878077 |
| ENSG00000101624 | 3.59533    | 0.026612 | 0.047068 | CEP76     | 18       | 12661832 | 12702776 |
| ENSG00000109680 | 2.775606   | 0.046829 | 0.049402 | TBC1D19   | 4        | 26578059 | 26756973 |
| ENSG00000109787 | 4.176352   | 0.020516 | 0.047068 | KLF3      | 4        | 38665817 | 38702663 |
| ENSG00000114956 | 3.661869   | 0.020849 | 0.047068 | DGUOK     | 2        | 74153953 | 74186088 |
| ENSG00000115165 | 3.510142   | 0.038225 | 0.049402 | CYTIP     | 2        | 1.58E+08 | 1.58E+08 |
| ENSG00000115274 | 3.071008   | 0.03287  | 0.047068 | INO80B    | 2        | 74682150 | 74688011 |
| ENSG00000115295 | 6.245322   | 0.002603 | 0.02443  | CLIP4     | 2        | 29320571 | 29412509 |
| ENSG00000115507 | 3.770522   | 0.032994 | 0.047068 | OTX1      | 2        | 63277192 | 63284971 |
| ENSG00000115514 | 2.980799   | 0.046745 | 0.049402 | TXNDC9    | 2        | 99935445 | 99957165 |
| ENSG00000119004 | 4.652566   | 0.007579 | 0.040362 | CYP20A1   | 2        | 2.04E+08 | 2.04E+08 |
| ENSG00000119778 | 3.773497   | 0.024441 | 0.047068 | ATAD2B    | 2        | 23971534 | 24149984 |
| ENSG00000119782 | 5.919707   | 0.003054 | 0.02443  | FKBP1B    | 2        | 24272571 | 24286551 |
| ENSG00000119801 | 5.638141   | 0.002937 | 0.02443  | YPEL5     | 2        | 30369807 | 30383399 |
| ENSG00000121152 | 4.101155   | 0.030901 | 0.047068 | NCAPH     | 2        | 97001525 | 97039583 |
| ENSG00000125571 | 4.042195   | 0.015743 | 0.047068 | IL37      | 2        | 1.14E+08 | 1.14E+08 |
| ENSG00000127419 | 2.99514    | 0.049242 | 0.049761 | TMEM175   | 4        | 926175   | 952444   |
| ENSG00000132305 | 1.672391   | 0.044617 | 0.049402 | IMMT      | 2        | 86371055 | 86422893 |
| ENSG00000132313 | 5.384364   | 0.00264  | 0.02443  | MRPL35    | 2        | 86426478 | 86440917 |
| ENSG00000132326 | 3.345671   | 0.029151 | 0.047068 | PER2      | 2        | 2.39E+08 | 2.39E+08 |
| ENSG00000134851 | 3.047109   | 0.018608 | 0.047068 | TMEM165   | 4        | 56262124 | 56319564 |
| ENSG00000136696 | 3.22829    | 0.027688 | 0.047068 | IL36B     | 2        | 1.14E+08 | 1.14E+08 |
| ENSG00000138028 | 2.591053   | 0.04536  | 0.049402 | CGREF1    | 2        | 27321757 | 27341995 |
| ENSG00000138030 | 4.113343   | 0.008195 | 0.040362 | KHK       | 2        | 27309615 | 27323640 |
| ENSG00000138068 | -2.16863   | 0.030111 | 0.047068 | SULT6B1   | 2        | 37394963 | 37423741 |
| ENSG00000138400 | 3.664988   | 0.009355 | 0.040362 | MDH1B     | 2        | 2.08E+08 | 2.08E+08 |
| ENSG00000138449 | 4.199288   | 0.015655 | 0.047068 | SLC40A1   | 2        | 1.9E+08  | 1.9E+08  |
| ENSG00000138639 | 3.288087   | 0.045329 | 0.049402 | ARHGAP2   | 4        | 86396267 | 86923823 |
| ENSG00000138794 | 2.95093    | 0.044527 | 0.049402 | CASP6     | 4        | 1.11E+08 | 1.11E+08 |
| ENSG00000144118 | 4.596606   | 0.007932 | 0.040362 | RALB      | 2        | 1.21E+08 | 1.21E+08 |
| ENSG00000144278 | 4.224027   | 0.012817 | 0.047068 | GALNT13   | 2        | 1.55E+08 | 1.55E+08 |
| ENSG00000144410 | 3.980849   | 0.018041 | 0.047068 | CPO       | 2        | 2.08E+08 | 2.08E+08 |
| ENSG00000144445 | 5.246384   | 0.015028 | 0.047068 | KANSL1L   | 2        | 2.11E+08 | 2.11E+08 |
| ENSG00000145241 | 2.910388   | 0.02139  | 0.047068 | CENPC     | 4        | 68337521 | 68411324 |
| ENSG00000145423 | 4.699491   | 0.021154 | 0.047068 | SFRP2     | 4        | 1.55E+08 | 1.55E+08 |
| ENSG00000145439 | 2.722847   | 0.041228 | 0.049402 | CBR4      | 4        | 1.7E+08  | 1.7E+08  |
| ENSG00000151834 | 6.352423   | 0.000759 | 0.024286 | GABRA2    | 4        | 46250444 | 46477247 |
| ENSG00000152147 | 3.072595   | 0.049222 | 0.049761 | GEMIN6    | 2        | 38978676 | 39012142 |
| ENSG00000152208 | 6.009667   | 0.00301  | 0.02443  | GRID2     | 4        | 93225550 | 94695707 |

|                 |          |          |          |          |    |          |          |
|-----------------|----------|----------|----------|----------|----|----------|----------|
| ENSG00000153237 | 6.50084  | 0.002163 | 0.02443  | CCDC148  | 2  | 1.59E+08 | 1.59E+08 |
| ENSG00000153563 | 4.468869 | 0.010143 | 0.040571 | CD8A     | 2  | 87011729 | 87035519 |
| ENSG00000154447 | 3.664214 | 0.033206 | 0.047068 | SH3RF1   | 4  | 1.7E+08  | 1.7E+08  |
| ENSG00000156096 | 2.895396 | 0.041945 | 0.049402 | UGT2B4   | 4  | 70345883 | 70391732 |
| ENSG00000158428 | 4.75535  | 0.041598 | 0.049402 | C2orf62  | 2  | 2.19E+08 | 2.19E+08 |
| ENSG00000162869 | 3.931868 | 0.009204 | 0.040362 | PPP1R21  | 2  | 48667737 | 48742525 |
| ENSG00000163734 | 3.570945 | 0.044121 | 0.049402 | CXCL3    | 4  | 74902306 | 74904524 |
| ENSG00000163945 | 2.113145 | 0.031928 | 0.047068 | UVSSA    | 4  | 1341054  | 1381837  |
| ENSG00000164023 | 4.910966 | 0.009372 | 0.040362 | SGMS2    | 4  | 1.09E+08 | 1.09E+08 |
| ENSG00000164107 | 3.709687 | 0.030311 | 0.047068 | HAND2    | 4  | 1.74E+08 | 1.74E+08 |
| ENSG00000164129 | 5.133601 | 0.018617 | 0.047068 | NPY5R    | 4  | 1.64E+08 | 1.64E+08 |
| ENSG00000164163 | 5.499382 | 0.00363  | 0.026809 | ABCE1    | 4  | 1.46E+08 | 1.46E+08 |
| ENSG00000166603 | 3.503564 | 0.033278 | 0.047068 | MC4R     | 18 | 58038564 | 58040001 |
| ENSG00000166862 | 6.395885 | 0.001693 | 0.02443  | CACNG2   | 22 | 36959968 | 37099603 |
| ENSG00000168758 | 5.989557 | 0.005    | 0.034287 | SEMA4C   | 2  | 97525453 | 97536494 |
| ENSG00000169031 | 2.877582 | 0.049003 | 0.049761 | COL4A3   | 2  | 2.28E+08 | 2.28E+08 |
| ENSG00000169575 | 4.094002 | 0.046388 | 0.049402 | VPREB1   | 22 | 22599087 | 22599927 |
| ENSG00000170365 | 8.306385 | 0.00021  | 0.013576 | SMAD1    | 4  | 1.46E+08 | 1.46E+08 |
| ENSG00000170634 | 2.173193 | 0.048285 | 0.049761 | ACYP2    | 2  | 54197975 | 54532437 |
| ENSG00000170820 | 3.420324 | 0.024547 | 0.047068 | FSHR     | 2  | 49189296 | 49381676 |
| ENSG00000171094 | 3.818857 | 0.022577 | 0.047068 | ALK      | 2  | 29415640 | 30144432 |
| ENSG00000171853 | 2.560979 | 0.026809 | 0.047068 | TRAPPC12 | 2  | 3383446  | 3488865  |
| ENSG00000172116 | 3.437303 | 0.019567 | 0.047068 | CD8B     | 2  | 87042462 | 87089047 |
| ENSG00000175387 | 3.709334 | 0.025657 | 0.047068 | SMAD2    | 18 | 45357922 | 45457515 |
| ENSG00000176714 | 4.479796 | 0.023115 | 0.047068 | CCDC121  | 2  | 27848506 | 27851879 |
| ENSG00000179270 | 2.741577 | 0.046578 | 0.049402 | C2orf71  | 2  | 29283842 | 29297127 |
| ENSG00000179921 | 4.195497 | 0.04458  | 0.049402 | GPBAR1   | 2  | 2.19E+08 | 2.19E+08 |
| ENSG00000180801 | 3.208168 | 0.03334  | 0.047068 | ARSJ     | 4  | 1.15E+08 | 1.15E+08 |
| ENSG00000182698 | 2.79253  | 0.049896 | 0.049896 | RESP18   | 2  | 2.2E+08  | 2.2E+08  |
| ENSG00000184611 | 3.719727 | 0.030258 | 0.047068 | KCNH7    | 2  | 1.63E+08 | 1.64E+08 |
| ENSG00000185339 | 2.666504 | 0.039436 | 0.049402 | TCN2     | 22 | 31002825 | 31023265 |
| ENSG00000187905 | 4.766819 | 0.006616 | 0.040362 | AC002472 | 22 | 21400249 | 21418457 |
| ENSG00000196628 | 3.998468 | 0.031278 | 0.047068 | TCF4     | 18 | 52889562 | 53332018 |
| ENSG00000197635 | 3.390028 | 0.038413 | 0.049402 | DPP4     | 2  | 1.63E+08 | 1.63E+08 |
| ENSG00000205593 | 2.686926 | 0.037502 | 0.049402 | DENND6B  | 22 | 50747459 | 50765489 |
| ENSG00000205639 | 2.726514 | 0.039166 | 0.049402 | MFSD2B   | 2  | 24232951 | 24286191 |
| ENSG00000205856 | 2.952926 | 0.043996 | 0.049402 | C22orf42 | 22 | 32544993 | 32555309 |
| ENSG00000219626 | 2.503203 | 0.027    | 0.047068 | FAM228B  | 2  | 24299396 | 24392509 |
| ENSG00000221843 | 3.739392 | 0.034226 | 0.047619 | C2orf16  | 2  | 27799389 | 27805588 |
| ENSG00000226479 | 2.894943 | 0.012114 | 0.046517 | TMEM185  | 2  | 1.21E+08 | 1.21E+08 |

| width   | strand | source         | type | gene_biotype   | eff_length |
|---------|--------|----------------|------|----------------|------------|
| 259453  | +      | ensembl_havana | gene | protein_coding | 2957       |
| 357174  | +      | ensembl_havana | gene | protein_coding | 15717      |
| 15538   | +      | ensembl_havana | gene | protein_coding | 2892       |
| 28489   | -      | ensembl_havana | gene | protein_coding | 1436       |
| 124091  | -      | ensembl_havana | gene | protein_coding | 5326       |
| 85940   | -      | ensembl_havana | gene | protein_coding | 13519      |
| 53531   | -      | ensembl_havana | gene | protein_coding | 8099       |
| 39934   | +      | ensembl_havana | gene | protein_coding | 3817       |
| 190056  | -      | ensembl_havana | gene | protein_coding | 17176      |
| 56585   | +      | ensembl_havana | gene | protein_coding | 3459       |
| 91263   | -      | ensembl_havana | gene | protein_coding | 9352       |
| 91720   | +      | ensembl_havana | gene | protein_coding | 10374      |
| 4123    | -      | ensembl_havana | gene | protein_coding | 2447       |
| 7514    | +      | ensembl_havana | gene | protein_coding | 867        |
| 11189   | -      | ensembl_havana | gene | protein_coding | 2388       |
| 25368   | +      | ensembl_havana | gene | protein_coding | 7338       |
| 15715   | -      | ensembl_havana | gene | protein_coding | 4375       |
| 14995   | -      | ensembl_havana | gene | protein_coding | 2050       |
| 40945   | -      | ensembl_havana | gene | protein_coding | 6158       |
| 178915  | +      | ensembl_havana | gene | protein_coding | 3434       |
| 36847   | +      | ensembl_havana | gene | protein_coding | 6297       |
| 32136   | +      | ensembl_havana | gene | protein_coding | 1455       |
| 74343   | -      | ensembl_havana | gene | protein_coding | 3428       |
| 5862    | +      | ensembl_havana | gene | protein_coding | 2466       |
| 91939   | +      | ensembl_havana | gene | protein_coding | 7775       |
| 7780    | +      | ensembl_havana | gene | protein_coding | 4833       |
| 21721   | -      | ensembl_havana | gene | protein_coding | 2816       |
| 59347   | +      | ensembl_havana | gene | protein_coding | 2916       |
| 178451  | -      | ensembl_havana | gene | protein_coding | 10492      |
| 13981   | +      | ensembl_havana | gene | protein_coding | 1677       |
| 13593   | +      | ensembl_havana | gene | protein_coding | 3421       |
| 38059   | +      | ensembl_havana | gene | protein_coding | 3278       |
| 5912    | +      | ensembl_havana | gene | protein_coding | 839        |
| 26270   | +      | ensembl_havana | gene | protein_coding | 3623       |
| 51839   | -      | ensembl_havana | gene | protein_coding | 3986       |
| 14440   | +      | ensembl_havana | gene | protein_coding | 3829       |
| 46065   | -      | ensembl_havana | gene | protein_coding | 6877       |
| 57441   | +      | ensembl_havana | gene | protein_coding | 7045       |
| 30777   | -      | ensembl_havana | gene | protein_coding | 1869       |
| 20239   | -      | ensembl_havana | gene | protein_coding | 4181       |
| 14026   | +      | ensembl_havana | gene | protein_coding | 3060       |
| 28779   | -      | ensembl_havana | gene | protein_coding | 1325       |
| 27785   | -      | ensembl_havana | gene | protein_coding | 3110       |
| 23180   | -      | ensembl_havana | gene | protein_coding | 4330       |
| 527557  | +      | ensembl_havana | gene | protein_coding | 7908       |
| 14955   | -      | ensembl_havana | gene | protein_coding | 1936       |
| 54650   | +      | ensembl_havana | gene | protein_coding | 2915       |
| 581936  | +      | ensembl_havana | gene | protein_coding | 6520       |
| 29921   | +      | ensembl_havana | gene | protein_coding | 1209       |
| 149961  | -      | ensembl_havana | gene | protein_coding | 8468       |
| 73804   | -      | ensembl_havana | gene | protein_coding | 5558       |
| 8529    | -      | ensembl_havana | gene | protein_coding | 2032       |
| 146506  | -      | ensembl_havana | gene | protein_coding | 5110       |
| 226804  | -      | ensembl_havana | gene | protein_coding | 11819      |
| 33467   | +      | ensembl_havana | gene | protein_coding | 4361       |
| 1470158 | +      | ensembl_havana | gene | protein_coding | 6722       |

|          |                |      |                |       |
|----------|----------------|------|----------------|-------|
| 285673 - | ensembl_havana | gene | protein_coding | 3790  |
| 23791 -  | ensembl_havana | gene | protein_coding | 3638  |
| 176850 - | ensembl_havana | gene | protein_coding | 5624  |
| 45850 -  | ensembl_havana | gene | protein_coding | 2489  |
| 11244 +  | ensembl_havana | gene | protein_coding | 3821  |
| 74789 +  | ensembl_havana | gene | protein_coding | 3990  |
| 2219 -   | ensembl_havana | gene | protein_coding | 2219  |
| 40784 +  | ensembl_havana | gene | protein_coding | 7830  |
| 90485 +  | ensembl_havana | gene | protein_coding | 7635  |
| 5261 -   | ensembl_havana | gene | protein_coding | 3601  |
| 7996 +   | ensembl_havana | gene | protein_coding | 3291  |
| 31248 +  | ensembl_havana | gene | protein_coding | 6265  |
| 1438 -   | ensembl_havana | gene | protein_coding | 1438  |
| 139636 - | ensembl_havana | gene | protein_coding | 3224  |
| 11042 -  | ensembl_havana | gene | protein_coding | 6157  |
| 150228 + | ensembl_havana | gene | protein_coding | 9124  |
| 841 +    | ensembl_havana | gene | protein_coding | 755   |
| 76886 +  | ensembl_havana | gene | protein_coding | 6058  |
| 334463 + | ensembl_havana | gene | protein_coding | 4964  |
| 192381 - | ensembl_havana | gene | protein_coding | 3170  |
| 728793 - | ensembl_havana | gene | protein_coding | 6882  |
| 105420 + | ensembl_havana | gene | protein_coding | 9193  |
| 46586 -  | ensembl_havana | gene | protein_coding | 1864  |
| 99594 -  | ensembl_havana | gene | protein_coding | 13770 |
| 3374 -   | ensembl_havana | gene | protein_coding | 2844  |
| 13286 -  | ensembl_havana | gene | protein_coding | 7273  |
| 4364 +   | ensembl_havana | gene | protein_coding | 2692  |
| 79444 -  | ensembl_havana | gene | protein_coding | 5024  |
| 5769 -   | ensembl_havana | gene | protein_coding | 1140  |
| 467324 - | ensembl_havana | gene | protein_coding | 4966  |
| 20441 +  | ensembl_havana | gene | protein_coding | 3122  |
| 18209 +  | ensembl_havana | gene | protein_coding | 5542  |
| 442457 - | ensembl_havana | gene | protein_coding | 22377 |
| 82302 -  | ensembl_havana | gene | protein_coding | 5009  |
| 18031 -  | ensembl_havana | gene | protein_coding | 5935  |
| 53241 +  | ensembl_havana | gene | protein_coding | 4438  |
| 10317 -  | ensembl_havana | gene | protein_coding | 2055  |
| 93114 +  | ensembl_havana | gene | protein_coding | 4915  |
| 6200 +   | ensembl_havana | gene | protein_coding | 6200  |
| 2131 -   | ensembl_havana | gene | protein_coding | 2131  |

Table S2. Genes with P &lt; 0.05 in the single-tissue association analysis.

| ID                 | Gene_narr | CHR | P0       | P1       | HSQ      | BEST.GWAS.ID |
|--------------------|-----------|-----|----------|----------|----------|--------------|
| ENSG00000000460.16 | FIRRM     | 1   | 1.7E+08  | 1.7E+08  | 0.06306  | rs2236868    |
| ENSG00000001084.10 | GCLC      | 6   | 53545128 | 53545129 | 0.059934 | rs546726     |
| ENSG00000004468.12 | CD38      | 4   | 15778274 | 15778275 | 0.158074 | rs10002931   |
| ENSG00000006530.15 | AGK       | 7   | 1.42E+08 | 1.42E+08 | 0.075288 | rs13236601   |
| ENSG00000006744.18 | ELAC2     | 17  | 13018186 | 13018187 | 0.35606  | rs17630644   |
| ENSG00000007129.17 | CEACAM2   | 19  | 41549517 | 41549518 | 0.113692 | rs4803481    |
| ENSG00000012223.12 | LTF       | 3   | 46485233 | 46485234 | 0.094738 | rs11926063   |
| ENSG00000013288.8  | MAN2B2    | 4   | 6575174  | 6575175  | 0.468    | rs6446517    |
| ENSG00000014919.12 | COX15     | 10  | 99732099 | 99732100 | 0.139728 | rs4917873    |
| ENSG00000016082.14 | ISL1      | 5   | 51383390 | 51383391 | 0.056968 | rs9291833    |
| ENSG00000017260.19 | ATP2C1    | 3   | 1.31E+08 | 1.31E+08 | 0.061435 | rs218481     |
| ENSG00000018236.14 | CNTN1     | 12  | 40692441 | 40692442 | 0.685445 | rs111177623  |
| ENSG00000019169.10 | MARCO     | 2   | 1.19E+08 | 1.19E+08 | 0.287694 | rs6542505    |
| ENSG00000023909.9  | GCLM      | 1   | 93909455 | 93909456 | 0.137126 | rs7523787    |
| ENSG00000032389.12 | EIPR1     | 2   | 3377881  | 3377882  | 0.114366 | rs7562936    |
| ENSG00000035664.11 | DAPK2     | 15  | 64072032 | 64072033 | 0.132044 | rs11632911   |
| ENSG00000035720.7  | STAP1     | 4   | 67558727 | 67558728 | 0.057666 | rs2119313    |
| ENSG00000036054.12 | TBC1D23   | 3   | 1E+08    | 1E+08    | 0.142208 | rs7619048    |
| ENSG00000038382.18 | TRIO      | 5   | 14143701 | 14143702 | 0.075703 | rs252217     |
| ENSG00000044459.14 | CNTLN     | 9   | 17134981 | 17134982 | 0.123329 | rs3808745    |
| ENSG00000047188.15 | YTHDC2    | 5   | 1.14E+08 | 1.14E+08 | 0.13687  | rs6878329    |
| ENSG00000050628.20 | PTGER3    | 1   | 71047807 | 71047808 | 0.305005 | rs2300167    |
| ENSG00000051382.8  | PIK3CB    | 3   | 1.39E+08 | 1.39E+08 | 0.104316 | rs17282752   |
| ENSG00000055732.12 | MCOLN3    | 1   | 85048498 | 85048499 | 0.050978 | rs9324143    |
| ENSG00000058404.19 | CAMK2B    | 7   | 44334576 | 44334577 | 0.105963 | rs17546439   |
| ENSG00000059728.10 | MXD1      | 2   | 69897687 | 69897688 | 0.027961 | rs2136437    |
| ENSG00000060339.13 | CCAR1     | 10  | 68721011 | 68721012 | 0.03222  | rs1694503    |
| ENSG00000064687.12 | ABCA7     | 19  | 1040100  | 1040101  | 0.37333  | rs4807387    |
| ENSG00000064999.13 | ANKS1A    | 6   | 34889264 | 34889265 | 0.061058 | rs3800400    |
| ENSG00000065135.10 | GNAI3     | 1   | 1.1E+08  | 1.1E+08  | 0.064744 | rs568686     |
| ENSG00000066135.12 | KDM4A     | 1   | 43650157 | 43650158 | 0.047186 | rs3011217    |
| ENSG00000066136.20 | NFYC      | 1   | 40692066 | 40692067 | 0.149477 | rs500586     |
| ENSG00000066230.10 | SLC9A3    | 5   | 524331   | 524332   | 0.596653 | rs9800013    |
| ENSG00000066697.14 | MSANTD3   | 9   | 1E+08    | 1E+08    | 0.074057 | rs4237198    |
| ENSG00000066855.15 | MTFR1     | 8   | 65644733 | 65644734 | 0.28077  | rs6472227    |
| ENSG00000067334.13 | DNTTIP2   | 1   | 93879917 | 93879918 | 0.076014 | rs7523787    |
| ENSG00000068654.15 | POLR1A    | 2   | 86106154 | 86106155 | 0.468009 | rs735738     |
| ENSG00000069974.15 | RAB27A    | 15  | 55314159 | 55314160 | 0.066136 | rs9920531    |
| ENSG00000070081.15 | NUCB2     | 11  | 17208152 | 17208153 | 0.193359 | rs11024098   |
| ENSG00000073605.18 | GSDMB     | 17  | 39918649 | 39918650 | 0.186691 | rs2517955    |
| ENSG00000075568.16 | TMEM131   | 2   | 97995890 | 97995891 | 0.129394 | rs1504680    |
| ENSG00000077157.21 | PPP1R12B  | 1   | 2.02E+08 | 2.02E+08 | 0.026659 | rs10800803   |
| ENSG00000079101.16 | CLUL1     | 18  | 596987   | 596988   | 0.144389 | rs7238337    |
| ENSG00000079462.7  | PAFAH1B3  | 19  | 42303545 | 42303546 | 0.095544 | rs851296     |
| ENSG00000079931.14 | MOXD1     | 6   | 1.32E+08 | 1.32E+08 | 0.193351 | rs7745230    |
| ENSG00000080293.9  | SCTR      | 2   | 1.2E+08  | 1.2E+08  | 0.18689  | rs6757992    |
| ENSG00000080854.14 | IGSF9B    | 11  | 1.34E+08 | 1.34E+08 | 0.144932 | rs329668     |
| ENSG00000081760.16 | AACS      | 12  | 1.25E+08 | 1.25E+08 | 0.156328 | rs10744185   |
| ENSG00000083814.13 | ZNF671    | 19  | 57727623 | 57727624 | 0.11687  | rs34640515   |
| ENSG00000084764.10 | MAPRE3    | 2   | 26970611 | 26970612 | 0.14001  | rs1275992    |
| ENSG00000085982.13 | USP40     | 2   | 2.34E+08 | 2.34E+08 | 0.333141 | rs12472244   |
| ENSG00000088298.12 | EDEM2     | 20  | 35147363 | 35147364 | 0.070448 | rs6060300    |
| ENSG00000088325.15 | TPX2      | 20  | 31739270 | 31739271 | 0.07029  | rs3203770    |
| ENSG00000088812.17 | ATRN      | 20  | 3471039  | 3471040  | 0.087522 | rs239187     |
| ENSG00000089486.16 | CDIP1     | 16  | 4538827  | 4538828  | 0.075892 | rs11862083   |
| ENSG00000089597.16 | GANAB     | 11  | 62646725 | 62646726 | 0.092538 | rs1058678    |

|                    |          |    |          |          |          |            |
|--------------------|----------|----|----------|----------|----------|------------|
| ENSG00000091127.13 | PUS7     | 7  | 1.06E+08 | 1.06E+08 | 0.093913 | rs1204371  |
| ENSG00000095319.14 | NUP188   | 9  | 1.29E+08 | 1.29E+08 | 0.073771 | rs10819457 |
| ENSG00000096384.19 | HSP90AB1 | 6  | 44246165 | 44246166 | 0.329647 | rs9357436  |
| ENSG00000097021.19 | ACOT7    | 1  | 6393553  | 6393554  | 0.183401 | rs11121699 |
| ENSG00000099337.4  | KCNK6    | 19 | 38319843 | 38319844 | 0.057029 | rs12984247 |
| ENSG00000099910.16 | KLHL22   | 22 | 20495882 | 20495883 | 0.052556 | rs361988   |
| ENSG00000099917.17 | MED15    | 22 | 20495912 | 20495913 | 0.150301 | rs361988   |
| ENSG00000099942.12 | CRKL     | 22 | 20917425 | 20917426 | 0.057791 | rs361988   |
| ENSG00000100075.9  | SLC25A1  | 22 | 19178829 | 19178830 | 0.141729 | rs5748167  |
| ENSG00000100201.20 | DDX17    | 22 | 38507659 | 38507660 | 0.100615 | rs135721   |
| ENSG00000100211.10 | CBY1     | 22 | 38656639 | 38656640 | 0.1263   | rs135721   |
| ENSG00000100221.10 | JOSD1    | 22 | 38701555 | 38701556 | 0.109624 | rs135721   |
| ENSG00000100336.17 | APOL4    | 22 | 36204839 | 36204840 | 0.492645 | rs2010467  |
| ENSG00000100393.12 | EP300    | 22 | 41091785 | 41091786 | 0.121472 | rs139513   |
| ENSG00000100664.10 | EIF5     | 14 | 1.03E+08 | 1.03E+08 | 0.061741 | rs2771369  |
| ENSG00000100883.11 | SRP54    | 14 | 34981956 | 34981957 | 0.06479  | rs8022575  |
| ENSG00000101000.5  | PROCR    | 20 | 35172072 | 35172073 | 0.25223  | rs6060300  |
| ENSG00000101190.12 | TCFL5    | 20 | 62861762 | 62861763 | 0.272302 | rs13036434 |
| ENSG00000101307.15 | SIRPB1   | 20 | 1620060  | 1620061  | 0.812624 | rs2092881  |
| ENSG00000101442.9  | ACTR5    | 20 | 38748441 | 38748442 | 0.198428 | rs415256   |
| ENSG00000102934.9  | PLLP     | 16 | 57284686 | 57284687 | 0.358545 | rs16965070 |
| ENSG00000103056.11 | SMPD3    | 16 | 68448687 | 68448688 | 0.100462 | rs255049   |
| ENSG00000103067.13 | ESRP2    | 16 | 68238101 | 68238102 | 0.131894 | rs255049   |
| ENSG00000104980.7  | TIMM44   | 19 | 7943919  | 7943920  | 0.197085 | rs250508   |
| ENSG00000105063.18 | PPP6R1   | 19 | 55258994 | 55258995 | 0.06995  | rs3810168  |
| ENSG00000105186.15 | ANKRD27  | 19 | 32675198 | 32675199 | 0.104212 | rs1013441  |
| ENSG00000105429.12 | MEGF8    | 19 | 42325608 | 42325609 | 0.036011 | rs851296   |
| ENSG00000105497.7  | ZNF175   | 19 | 51571297 | 51571298 | 0.269945 | rs1568003  |
| ENSG00000105549.10 | SPMAP2   | 19 | 376669   | 376670   | 0.060616 | rs2074639  |
| ENSG00000105778.18 | AVL9     | 7  | 32495425 | 32495426 | 0.069832 | rs2060707  |
| ENSG00000106069.21 | CHN2     | 7  | 29122273 | 29122274 | 0.076292 | rs245960   |
| ENSG00000106404.13 | CLDN15   | 7  | 1.01E+08 | 1.01E+08 | 0.334557 | rs12532732 |
| ENSG00000106624.10 | AEBP1    | 7  | 44104360 | 44104361 | 0.11481  | rs17546439 |
| ENSG00000106633.15 | GCK      | 7  | 44198169 | 44198170 | 0.249147 | rs17546439 |
| ENSG00000107281.9  | NPDC1    | 9  | 1.37E+08 | 1.37E+08 | 0.096804 | rs11145975 |
| ENSG00000108094.14 | CUL2     | 10 | 35090641 | 35090642 | 0.037866 | rs4934750  |
| ENSG00000108107.14 | RPL28    | 19 | 55385344 | 55385345 | 0.461228 | rs299163   |
| ENSG00000108424.9  | KPNB1    | 17 | 47649475 | 47649476 | 0.041509 | rs1808192  |
| ENSG00000108474.16 | PIGL     | 17 | 16217208 | 16217209 | 0.048216 | rs11574935 |
| ENSG00000108950.11 | FAM20A   | 17 | 68601388 | 68601389 | 0.143127 | rs3744506  |
| ENSG00000108963.17 | DPH1     | 17 | 2030109  | 2030110  | 0.172413 | rs11559309 |
| ENSG00000109534.16 | GAR1     | 4  | 1.1E+08  | 1.1E+08  | 0.051609 | rs2285714  |
| ENSG00000110169.10 | HPX      | 11 | 6442616  | 6442617  | 0.135715 | rs17821052 |
| ENSG00000110448.10 | CD5      | 11 | 61102394 | 61102395 | 0.132487 | rs754382   |
| ENSG00000110628.13 | SLC22A18 | 11 | 2899790  | 2899791  | 0.130305 | rs17744036 |
| ENSG00000110801.13 | PSMD9    | 12 | 1.22E+08 | 1.22E+08 | 0.043519 | rs7313015  |
| ENSG00000111077.17 | TNS2     | 12 | 53047050 | 53047051 | 0.322607 | rs10876386 |
| ENSG00000111142.13 | METAP2   | 12 | 95473519 | 95473520 | 0.105493 | rs301016   |
| ENSG00000111450.13 | STX2     | 12 | 1.31E+08 | 1.31E+08 | 0.485158 | rs12818393 |
| ENSG00000111602.11 | TIMELESS | 12 | 56449402 | 56449403 | 0.044818 | rs7296038  |
| ENSG00000111707.11 | SUDS3    | 12 | 1.18E+08 | 1.18E+08 | 0.100255 | rs9943819  |
| ENSG00000111846.16 | GCNT2    | 6  | 10492222 | 10492223 | 0.114506 | rs692986   |
| ENSG00000111879.18 | FAM184A  | 6  | 1.19E+08 | 1.19E+08 | 0.286439 | rs11751221 |
| ENSG00000112406.4  | HECA     | 6  | 1.39E+08 | 1.39E+08 | 0.039041 | rs2064304  |
| ENSG00000112877.7  | CEP72    | 5  | 612271   | 612272   | 0.050481 | rs9800013  |
| ENSG00000113231.13 | PDE8B    | 5  | 77210448 | 77210449 | 0.186421 | rs1529505  |
| ENSG00000113296.14 | THBS4    | 5  | 79991310 | 79991311 | 0.057587 | rs16877256 |
| ENSG00000113763.10 | UNC5A    | 5  | 1.77E+08 | 1.77E+08 | 0.087732 | rs501666   |

|                    |          |    |          |          |          |            |
|--------------------|----------|----|----------|----------|----------|------------|
| ENSG00000114124.2  | GRK7     | 3  | 1.42E+08 | 1.42E+08 | 0.21307  | rs6769161  |
| ENSG00000114770.16 | ABCC5    | 3  | 1.84E+08 | 1.84E+08 | 0.106694 | rs12638094 |
| ENSG00000114841.17 | DNAH1    | 3  | 52316318 | 52316319 | 0.040146 | rs323893   |
| ENSG00000115085.13 | ZAP70    | 2  | 97713559 | 97713560 | 0.119156 | rs13008503 |
| ENSG00000115274.14 | INO80B   | 2  | 74455022 | 74455023 | 0.121196 | rs205636   |
| ENSG00000115468.11 | EFHD1    | 2  | 2.33E+08 | 2.33E+08 | 0.089196 | rs17362914 |
| ENSG00000115507.9  | OTX1     | 2  | 63050056 | 63050057 | 0.039678 | rs2421860  |
| ENSG00000115523.16 | GNLY     | 2  | 85694290 | 85694291 | 0.163473 | rs735738   |
| ENSG00000116337.15 | AMPD2    | 1  | 1.1E+08  | 1.1E+08  | 0.132749 | rs568686   |
| ENSG00000116962.14 | NID1     | 1  | 2.36E+08 | 2.36E+08 | 0.083227 | rs4660140  |
| ENSG00000117640.17 | MTFR1L   | 1  | 25820797 | 25820798 | 0.170817 | rs4075441  |
| ENSG00000118197.13 | DDX59    | 1  | 2.01E+08 | 2.01E+08 | 0.21794  | rs2246923  |
| ENSG00000118217.5  | ATF6     | 1  | 1.62E+08 | 1.62E+08 | 0.046994 | rs6678315  |
| ENSG00000119537.15 | KDSR     | 18 | 63367326 | 63367327 | 0.223011 | rs4987852  |
| ENSG00000119787.13 | ATL2     | 2  | 38377284 | 38377285 | 0.054444 | rs2888570  |
| ENSG00000120306.9  | CYSTM1   | 5  | 1.4E+08  | 1.4E+08  | 0.050882 | rs13153401 |
| ENSG00000120314.18 | WDR55    | 5  | 1.41E+08 | 1.41E+08 | 0.062519 | rs246039   |
| ENSG00000120322.3  | PCDHB8   | 5  | 1.41E+08 | 1.41E+08 | 0.460382 | rs2472647  |
| ENSG00000120539.14 | MASTL    | 10 | 27155266 | 27155267 | 0.558707 | rs11015739 |
| ENSG00000121578.12 | B4GALT4  | 3  | 1.19E+08 | 1.19E+08 | 0.16775  | rs935616   |
| ENSG00000121957.12 | GPSM2    | 1  | 1.09E+08 | 1.09E+08 | 0.15653  | rs600806   |
| ENSG00000122034.14 | GTF3A    | 13 | 27424543 | 27424544 | 0.138742 | rs9581798  |
| ENSG00000122547.10 | EEDP1    | 7  | 36153148 | 36153149 | 0.079149 | rs2700914  |
| ENSG00000123096.11 | SSPN     | 12 | 26134963 | 26134964 | 0.30583  | rs1385342  |
| ENSG00000123453.17 | SARDH    | 9  | 1.34E+08 | 1.34E+08 | 0.267424 | rs495828   |
| ENSG00000123552.17 | USP45    | 6  | 99521727 | 99521728 | 0.059939 | rs4840040  |
| ENSG00000124067.16 | SLC12A4  | 16 | 67969600 | 67969601 | 0.05423  | rs255049   |
| ENSG00000124191.17 | TOX2     | 20 | 43914863 | 43914864 | 0.305624 | rs1014732  |
| ENSG00000125520.13 | SLC2A4RC | 20 | 63739860 | 63739861 | 0.061671 | rs310631   |
| ENSG00000125912.10 | NCLN     | 19 | 3185562  | 3185563  | 0.330763 | rs2304247  |
| ENSG00000127084.17 | FGD3     | 9  | 92947450 | 92947451 | 0.30219  | rs4744170  |
| ENSG00000127311.9  | HELB     | 12 | 66302544 | 66302545 | 0.351297 | rs1870566  |
| ENSG00000128604.19 | IRF5     | 7  | 1.29E+08 | 1.29E+08 | 0.288763 | rs339083   |
| ENSG00000128606.12 | LRRC17   | 7  | 1.03E+08 | 1.03E+08 | 0.083057 | rs4989124  |
| ENSG00000128617.2  | OPN1SW   | 7  | 1.29E+08 | 1.29E+08 | 0.132955 | rs339083   |
| ENSG00000128829.11 | EIF2AK4  | 15 | 39934145 | 39934146 | 0.415609 | rs11638855 |
| ENSG00000129351.17 | ILF3     | 19 | 10654260 | 10654261 | 0.045452 | rs892085   |
| ENSG00000129534.13 | MIS18BP1 | 14 | 45253539 | 45253540 | 0.148237 | rs10151310 |
| ENSG00000130881.13 | LRP3     | 19 | 33177602 | 33177603 | 0.068661 | rs4805031  |
| ENSG00000131370.15 | SH3BP5   | 3  | 15341367 | 15341368 | 0.067487 | rs2688672  |
| ENSG00000131966.13 | ACTR10   | 14 | 58200079 | 58200080 | 0.465711 | rs311817   |
| ENSG00000132000.11 | PODNL1   | 19 | 13953391 | 13953392 | 0.1141   | rs2420543  |
| ENSG00000132002.7  | DNAJB1   | 19 | 14529769 | 14529770 | 0.186915 | rs2420543  |
| ENSG00000132017.10 | DCAF15   | 19 | 13952491 | 13952492 | 0.067742 | rs2420543  |
| ENSG00000132305.20 | IMMT     | 2  | 86195588 | 86195589 | 0.284327 | rs735738   |
| ENSG00000132793.11 | LPIN3    | 20 | 41340919 | 41340920 | 0.140189 | rs6072343  |
| ENSG00000132953.16 | XPO4     | 13 | 20903047 | 20903048 | 0.040745 | rs261415   |
| ENSG00000133083.14 | DCLK1    | 13 | 36131305 | 36131306 | 0.076524 | rs9531538  |
| ENSG00000133398.3  | MED10    | 5  | 6378593  | 6378594  | 0.104179 | rs10056261 |
| ENSG00000133424.20 | LARGE1   | 22 | 33922840 | 33922841 | 0.113932 | rs169467   |
| ENSG00000134014.16 | ELP3     | 8  | 28089672 | 28089673 | 0.252229 | rs2614053  |
| ENSG00000134215.15 | VAV3     | 1  | 1.08E+08 | 1.08E+08 | 0.120968 | rs11185128 |
| ENSG00000134243.11 | SORT1    | 1  | 1.09E+08 | 1.09E+08 | 0.100426 | rs568686   |
| ENSG00000134627.11 | PIWIL4   | 11 | 94567307 | 94567308 | 0.048958 | rs7110768  |
| ENSG00000135052.16 | GOLM1    | 9  | 86100172 | 86100173 | 0.221339 | rs17353249 |
| ENSG00000135314.12 | KHDC1    | 6  | 73310364 | 73310365 | 0.106118 | rs6916116  |
| ENSG00000135378.3  | PRRG4    | 11 | 32829942 | 32829943 | 0.051884 | rs267428   |
| ENSG00000135549.14 | PKIB     | 6  | 1.22E+08 | 1.22E+08 | 0.160454 | rs12192856 |

|                    |           |    |          |          |          |            |
|--------------------|-----------|----|----------|----------|----------|------------|
| ENSG00000135597.18 | REPS1     | 6  | 1.39E+08 | 1.39E+08 | 0.044509 | rs2064304  |
| ENSG00000136237.18 | RAPGEF5   | 7  | 22357143 | 22357144 | 0.173005 | rs13227860 |
| ENSG00000136279.20 | DBNL      | 7  | 44044639 | 44044640 | 0.276438 | rs17546439 |
| ENSG00000136449.13 | MYCBPAP   | 17 | 50508383 | 50508384 | 0.053997 | rs9890089  |
| ENSG00000137714.2  | FDX1      | 11 | 1.1E+08  | 1.1E+08  | 0.14724  | rs10749961 |
| ENSG00000137992.14 | DBT       | 1  | 1E+08    | 1E+08    | 0.04044  | rs4908074  |
| ENSG00000138028.15 | CGREF1    | 2  | 27119114 | 27119115 | 0.091349 | rs4666001  |
| ENSG00000138030.12 | KHK       | 2  | 27086746 | 27086747 | 0.308235 | rs11902826 |
| ENSG00000138286.14 | FAM149B   | 10 | 73168165 | 73168166 | 0.037676 | rs7918183  |
| ENSG00000138593.8  | SECISBP2L | 15 | 49046562 | 49046563 | 0.034878 | rs16962418 |
| ENSG00000139364.10 | TMEM132   | 12 | 1.25E+08 | 1.25E+08 | 0.078149 | rs10744185 |
| ENSG00000139531.12 | SUOX      | 12 | 55997179 | 55997180 | 0.379047 | rs7296038  |
| ENSG00000140265.12 | ZSCAN29   | 15 | 43371024 | 43371025 | 0.060644 | rs7166467  |
| ENSG00000140479.16 | PCSK6     | 15 | 1.02E+08 | 1.02E+08 | 0.061642 | rs924014   |
| ENSG00000140575.12 | IQGAP1    | 15 | 90388217 | 90388218 | 0.335021 | rs365931   |
| ENSG00000140577.15 | CRTC3     | 15 | 90529924 | 90529925 | 0.152297 | rs365931   |
| ENSG00000140598.13 | EFL1      | 15 | 82262762 | 82262763 | 0.071797 | rs12324875 |
| ENSG00000140623.13 | SEPTIN12  | 16 | 4788395  | 4788396  | 0.283377 | rs11862083 |
| ENSG00000140750.16 | ARHGAP1   | 16 | 25015665 | 25015666 | 0.065841 | rs4787669  |
| ENSG00000141012.12 | GALNS     | 16 | 88856969 | 88856970 | 0.171396 | rs3826061  |
| ENSG00000141013.16 | GAS8      | 16 | 90019628 | 90019629 | 0.256328 | rs4408545  |
| ENSG00000141279.15 | NPEPPS    | 17 | 47522941 | 47522942 | 0.096033 | rs1808192  |
| ENSG00000141391.13 | PRELID3A  | 18 | 12407895 | 12407896 | 0.245498 | rs11664013 |
| ENSG00000141560.14 | FN3KRP    | 17 | 82716682 | 82716683 | 0.648545 | rs4789846  |
| ENSG00000141736.13 | ERBB2     | 17 | 39688107 | 39688108 | 0.056257 | rs2517955  |
| ENSG00000141854.9  | MISP3     | 19 | 14072535 | 14072536 | 0.163979 | rs2420543  |
| ENSG00000141858.11 | SAMD1     | 19 | 14091035 | 14091036 | 0.068063 | rs2420543  |
| ENSG00000141956.13 | PRDM15    | 21 | 41879481 | 41879482 | 0.489395 | rs220298   |
| ENSG00000141959.16 | PFKL      | 21 | 44300050 | 44300051 | 0.390299 | rs4818950  |
| ENSG00000142046.14 | TMEM91    | 19 | 41350910 | 41350911 | 0.097471 | rs10409701 |
| ENSG00000142233.11 | NTN5      | 19 | 48673080 | 48673081 | 0.272573 | rs10413911 |
| ENSG00000142459.8  | EVI5L     | 19 | 7830232  | 7830233  | 0.074727 | rs250508   |
| ENSG00000142609.17 | CFAP74    | 1  | 2003836  | 2003837  | 0.042833 | rs16824588 |
| ENSG00000142856.16 | ITGB3BP   | 1  | 63529185 | 63529186 | 0.658725 | rs7513180  |
| ENSG00000143603.18 | KCNN3     | 1  | 1.55E+08 | 1.55E+08 | 0.097327 | rs10908445 |
| ENSG00000143653.9  | SCCPDH    | 1  | 2.47E+08 | 2.47E+08 | 0.312117 | rs10924924 |
| ENSG00000143771.11 | CNIH4     | 1  | 2.24E+08 | 2.24E+08 | 0.312371 | rs6698799  |
| ENSG00000143951.15 | WDPCP     | 2  | 63827842 | 63827843 | 0.032243 | rs12464279 |
| ENSG00000144191.11 | CNGA3     | 2  | 98346154 | 98346155 | 0.05791  | rs17021869 |
| ENSG00000144278.14 | GALNT13   | 2  | 1.54E+08 | 1.54E+08 | 0.10268  | rs12998004 |
| ENSG00000144395.17 | CCDC150   | 2  | 1.97E+08 | 1.97E+08 | 0.087852 | rs2376186  |
| ENSG00000144401.14 | METTL21A  | 2  | 2.08E+08 | 2.08E+08 | 0.066531 | rs1055229  |
| ENSG00000144736.13 | SHQ1      | 3  | 72861913 | 72861914 | 0.131639 | rs2035580  |
| ENSG00000144791.9  | LIMD1     | 3  | 45555393 | 45555394 | 0.320548 | rs35669129 |
| ENSG00000144868.13 | TMEM108   | 3  | 1.33E+08 | 1.33E+08 | 0.052586 | rs7652595  |
| ENSG00000145723.16 | GIN1      | 5  | 1.03E+08 | 1.03E+08 | 0.025426 | rs28043    |
| ENSG00000145730.20 | PAM       | 5  | 1.03E+08 | 1.03E+08 | 0.111331 | rs28043    |
| ENSG00000145743.15 | FBXL17    | 5  | 1.08E+08 | 1.08E+08 | 0.053778 | rs7727133  |
| ENSG00000145808.9  | ADAMTS1   | 5  | 1.29E+08 | 1.29E+08 | 0.190899 | rs2312243  |
| ENSG00000146007.10 | ZMAT2     | 5  | 1.41E+08 | 1.41E+08 | 0.09426  | rs246039   |
| ENSG00000146267.11 | FAXC      | 6  | 99350061 | 99350062 | 0.096082 | rs4840040  |
| ENSG00000146587.17 | RBAK      | 7  | 5045820  | 5045821  | 0.307122 | rs7793919  |
| ENSG00000147535.16 | PLPP5     | 8  | 38269242 | 38269243 | 0.029771 | rs17435276 |
| ENSG00000148300.11 | REXO4     | 9  | 1.33E+08 | 1.33E+08 | 0.075664 | rs495828   |
| ENSG00000150316.11 | CWC15     | 11 | 94973611 | 94973612 | 0.054468 | rs644756   |
| ENSG00000151224.12 | MAT1A     | 10 | 80289683 | 80289684 | 0.263539 | rs10887701 |
| ENSG00000151353.14 | TMEM18    | 2  | 676703   | 676704   | 0.177337 | rs12990777 |
| ENSG00000151366.12 | NDUFC2    | 11 | 78080218 | 78080219 | 0.194915 | rs499517   |

|                    |          |    |          |          |          |            |
|--------------------|----------|----|----------|----------|----------|------------|
| ENSG00000151575.14 | TEX9     | 15 | 56244008 | 56244009 | 0.210971 | rs877045   |
| ENSG00000151917.17 | BEND6    | 6  | 56955125 | 56955126 | 0.28816  | rs7753537  |
| ENSG00000152104.11 | PTPN14   | 1  | 2.15E+08 | 2.15E+08 | 0.157381 | rs1528858  |
| ENSG00000152778.8  | IFIT5    | 10 | 89414585 | 89414586 | 0.318186 | rs1332327  |
| ENSG00000153406.13 | NMRAL1   | 16 | 4495762  | 4495763  | 0.295291 | rs11862083 |
| ENSG00000153574.8  | RPIA     | 2  | 88691643 | 88691644 | 0.119202 | rs34383387 |
| ENSG00000153904.18 | DDAH1    | 1  | 85578362 | 85578363 | 0.114636 | rs7556366  |
| ENSG00000154079.5  | SDHAF4   | 6  | 70566916 | 70566917 | 0.091526 | rs9455078  |
| ENSG00000154274.14 | C4orf19  | 4  | 37453940 | 37453941 | 0.101    | rs2973241  |
| ENSG00000154645.13 | CHODL    | 21 | 17901262 | 17901263 | 0.258028 | rs211978   |
| ENSG00000155380.11 | SLC16A1  | 1  | 1.13E+08 | 1.13E+08 | 0.079275 | rs17014869 |
| ENSG00000155629.14 | PIK3AP1  | 10 | 96720513 | 96720514 | 0.177932 | rs2784920  |
| ENSG00000155868.7  | MED7     | 5  | 1.57E+08 | 1.57E+08 | 0.043662 | rs7717784  |
| ENSG00000156510.12 | HKDC1    | 10 | 69220302 | 69220303 | 0.133883 | rs1694503  |
| ENSG00000156521.13 | TYSND1   | 10 | 70146675 | 70146676 | 0.171355 | rs1227755  |
| ENSG00000157224.15 | CLDN12   | 7  | 90383720 | 90383721 | 0.047318 | rs12154932 |
| ENSG00000157927.16 | RADIL    | 7  | 4883718  | 4883719  | 0.213884 | rs7793919  |
| ENSG00000158186.12 | MRAS     | 3  | 1.38E+08 | 1.38E+08 | 0.070842 | rs17282752 |
| ENSG00000158220.13 | ESYT3    | 3  | 1.38E+08 | 1.38E+08 | 0.236423 | rs17282752 |
| ENSG00000158270.11 | COLEC12  | 18 | 500721   | 500722   | 0.169587 | rs7238337  |
| ENSG00000158555.14 | GDPD5    | 11 | 75525902 | 75525903 | 0.138131 | rs472112   |
| ENSG00000158764.6  | ITLN2    | 1  | 1.61E+08 | 1.61E+08 | 0.222142 | rs6678315  |
| ENSG00000158769.17 | F11R     | 1  | 1.61E+08 | 1.61E+08 | 0.071141 | rs6678315  |
| ENSG00000158792.15 | SPATA2L  | 16 | 89701704 | 89701705 | 0.153929 | rs4408545  |
| ENSG00000159111.12 | MRPL10   | 17 | 47831533 | 47831534 | 0.124592 | rs1808192  |
| ENSG00000159674.11 | SPON2    | 4  | 1208961  | 1208962  | 0.036939 | rs3822023  |
| ENSG00000159692.15 | CTBP1    | 4  | 1249136  | 1249137  | 0.109481 | rs3822023  |
| ENSG00000159921.14 | GNE      | 9  | 36277055 | 36277056 | 0.052033 | rs13291966 |
| ENSG00000160284.14 | SPATC1L  | 21 | 46184475 | 46184476 | 0.726687 | rs4438580  |
| ENSG00000160294.10 | MCM3AP   | 21 | 46286296 | 46286297 | 0.368184 | rs4438580  |
| ENSG00000161395.13 | PGAP3    | 17 | 39696796 | 39696797 | 0.156481 | rs2517955  |
| ENSG00000162244.10 | RPL29    | 3  | 51995941 | 51995942 | 0.164407 | rs323893   |
| ENSG00000162585.16 | FAAP20   | 1  | 2212719  | 2212720  | 0.499162 | rs16824588 |
| ENSG00000162923.14 | WDR26    | 1  | 2.24E+08 | 2.24E+08 | 0.204296 | rs6698799  |
| ENSG00000163145.12 | C1QTNF7  | 4  | 15339817 | 15339818 | 0.04789  | rs10002931 |
| ENSG00000163214.20 | DHX57    | 2  | 38875933 | 38875934 | 0.136208 | rs2888570  |
| ENSG00000163251.3  | FZD5     | 2  | 2.08E+08 | 2.08E+08 | 0.04961  | rs1055229  |
| ENSG00000163293.11 | NIPAL1   | 4  | 47914205 | 47914206 | 0.084817 | rs6447603  |
| ENSG00000163320.10 | CGGBP1   | 3  | 88149741 | 88149742 | 0.555143 | rs17025160 |
| ENSG00000163344.5  | PMVK     | 1  | 1.55E+08 | 1.55E+08 | 0.053194 | rs10908445 |
| ENSG00000163686.14 | ABHD6    | 3  | 58237505 | 58237506 | 0.184886 | rs7633553  |
| ENSG00000163743.13 | RCHY1    | 4  | 75514216 | 75514217 | 0.070491 | rs11731477 |
| ENSG00000163945.15 | UVSSA    | 4  | 1347265  | 1347266  | 0.548668 | rs3822023  |
| ENSG00000163946.13 | TASOR    | 3  | 56683236 | 56683237 | 0.133085 | rs13099722 |
| ENSG00000163956.10 | LRPAP1   | 4  | 3532558  | 3532559  | 0.242136 | rs2237011  |
| ENSG00000164039.14 | BDH2     | 4  | 1.03E+08 | 1.03E+08 | 0.42796  | rs7691671  |
| ENSG00000164088.17 | PPM1M    | 3  | 52245792 | 52245793 | 0.118426 | rs323893   |
| ENSG00000164251.4  | F2RL1    | 5  | 76818932 | 76818933 | 0.058329 | rs1529505  |
| ENSG00000164253.13 | WDR41    | 5  | 77620610 | 77620611 | 0.48063  | rs10942833 |
| ENSG00000164366.3  | CCDC127  | 5  | 218214   | 218215   | 0.072772 | rs9800013  |
| ENSG00000164542.12 | MATCAP2  | 7  | 36390124 | 36390125 | 0.462714 | rs2700914  |
| ENSG00000164627.17 | KIF6     | 6  | 39725404 | 39725405 | 0.114185 | rs9471175  |
| ENSG00000164850.14 | GPB1     | 7  | 1082207  | 1082208  | 0.127883 | rs12540123 |
| ENSG00000164933.11 | SLC25A32 | 8  | 1.03E+08 | 1.03E+08 | 0.075718 | rs2554733  |
| ENSG00000165644.10 | COMTD1   | 10 | 75236029 | 75236030 | 0.112133 | rs10762651 |
| ENSG00000165731.18 | RET      | 10 | 43077026 | 43077027 | 0.09125  | rs2503846  |
| ENSG00000165806.19 | CASP7    | 10 | 1.14E+08 | 1.14E+08 | 0.443022 | rs12768105 |
| ENSG00000165887.11 | ANKRD2   | 10 | 97572498 | 97572499 | 0.089962 | rs10882962 |

|                    |          |    |          |          |          |            |
|--------------------|----------|----|----------|----------|----------|------------|
| ENSG00000165899.10 | OTOGL    | 12 | 80209452 | 80209453 | 0.186651 | rs1997279  |
| ENSG00000166024.13 | R3HCC1L  | 10 | 98134623 | 98134624 | 0.110195 | rs514554   |
| ENSG00000166148.3  | AVPR1A   | 12 | 63150941 | 63150942 | 0.136395 | rs549889   |
| ENSG00000166224.16 | SGPL1    | 10 | 70815960 | 70815961 | 0.264191 | rs10762399 |
| ENSG00000166228.8  | PCBD1    | 10 | 70888783 | 70888784 | 0.11972  | rs2243540  |
| ENSG00000166268.10 | MYRFL    | 12 | 69825303 | 69825304 | 0.301358 | rs710742   |
| ENSG00000166321.13 | NUDT13   | 10 | 73110374 | 73110375 | 0.255516 | rs7918183  |
| ENSG00000166452.11 | AKIP1    | 11 | 8911138  | 8911139  | 0.078912 | rs1367     |
| ENSG00000166669.13 | ATF7IP2  | 16 | 10326433 | 10326434 | 0.364712 | rs3865198  |
| ENSG00000167113.10 | COQ4     | 9  | 1.28E+08 | 1.28E+08 | 0.106443 | rs13285411 |
| ENSG00000167969.12 | ECI1     | 16 | 2252299  | 2252300  | 0.270294 | rs739717   |
| ENSG00000168116.13 | KIAA1586 | 6  | 57046531 | 57046532 | 0.080469 | rs7753537  |
| ENSG00000168291.12 | PDHB     | 3  | 58433856 | 58433857 | 0.256231 | rs7633553  |
| ENSG00000168297.15 | PXK      | 3  | 58332879 | 58332880 | 0.129388 | rs7633553  |
| ENSG00000168566.12 | SNRNP48  | 6  | 7590198  | 7590199  | 0.069113 | rs9328426  |
| ENSG00000168569.7  | TMEM223  | 11 | 62792020 | 62792021 | 0.115572 | rs1058678  |
| ENSG00000168661.14 | ZNF30    | 19 | 34926902 | 34926903 | 0.10746  | rs2546048  |
| ENSG00000168887.10 | C2orf68  | 2  | 85612065 | 85612066 | 0.090275 | rs735738   |
| ENSG00000169129.14 | AFAP1L2  | 10 | 1.14E+08 | 1.14E+08 | 0.096944 | rs17719089 |
| ENSG00000169282.17 | KCNAB1   | 3  | 1.56E+08 | 1.56E+08 | 0.032788 | rs13078555 |
| ENSG00000169570.9  | DTWD2    | 5  | 1.19E+08 | 1.19E+08 | 0.084187 | rs2036565  |
| ENSG00000169826.7  | CSGALNA  | 10 | 43138485 | 43138486 | 0.269686 | rs2503846  |
| ENSG00000170369.3  | CST2     | 20 | 23826730 | 23826731 | 0.056714 | rs12480224 |
| ENSG00000170423.12 | KRT78    | 12 | 52849091 | 52849092 | 0.0955   | rs10876386 |
| ENSG00000170464.9  | DNAJC18  | 5  | 1.39E+08 | 1.39E+08 | 0.206531 | rs3924257  |
| ENSG00000170465.9  | KRT6C    | 12 | 52473784 | 52473785 | 0.214479 | rs1791643  |
| ENSG00000170469.10 | SPATA24  | 5  | 1.39E+08 | 1.39E+08 | 0.058187 | rs3924257  |
| ENSG00000170482.16 | SLC23A1  | 5  | 1.39E+08 | 1.39E+08 | 0.386293 | rs3924257  |
| ENSG00000170500.12 | LONRF2   | 2  | 1E+08    | 1E+08    | 0.128509 | rs7577100  |
| ENSG00000170549.3  | IRX1     | 5  | 3596053  | 3596054  | 0.122536 | rs1215411  |
| ENSG00000170627.10 | GTSF1    | 12 | 54473598 | 54473599 | 0.135176 | rs868690   |
| ENSG00000170955.9  | CAVIN3   | 11 | 6320646  | 6320647  | 0.195756 | rs17821052 |
| ENSG00000171017.10 | LRR8E    | 19 | 7888504  | 7888505  | 0.305004 | rs250508   |
| ENSG00000171246.5  | NPTX1    | 17 | 80477842 | 80477843 | 0.337772 | rs2044102  |
| ENSG00000171444.17 | MCC      | 5  | 1.13E+08 | 1.13E+08 | 0.286356 | rs6878329  |
| ENSG00000171530.13 | TBCA     | 5  | 77868779 | 77868780 | 0.049219 | rs10942833 |
| ENSG00000171617.13 | ENC1     | 5  | 74641423 | 74641424 | 0.178809 | rs300240   |
| ENSG00000172057.9  | ORMDL3   | 17 | 39927600 | 39927601 | 0.190912 | rs2517955  |
| ENSG00000172466.15 | ZNF24    | 18 | 35345481 | 35345482 | 0.089852 | rs8091811  |
| ENSG00000172824.14 | CES4A    | 16 | 66988588 | 66988589 | 0.05586  | rs7200919  |
| ENSG00000173041.11 | ZNF680   | 7  | 64563105 | 64563106 | 0.099118 | rs10273013 |
| ENSG00000173480.10 | ZNF417   | 19 | 57916609 | 57916610 | 0.120347 | rs34640515 |
| ENSG00000173540.12 | GMPPB    | 3  | 49723950 | 49723951 | 0.354925 | rs1986599  |
| ENSG00000173542.8  | MOB1B    | 4  | 70902325 | 70902326 | 0.120652 | rs16846318 |
| ENSG00000173960.13 | UBXN2A   | 2  | 23927284 | 23927285 | 0.097235 | rs13034826 |
| ENSG00000174032.16 | SLC25A30 | 13 | 45411937 | 45411938 | 0.242489 | rs6561271  |
| ENSG00000174586.10 | ZNF497   | 19 | 58362847 | 58362848 | 0.251156 | rs34640515 |
| ENSG00000174943.9  | KCTD13   | 16 | 29926834 | 29926835 | 0.029927 | rs9938630  |
| ENSG00000174950.10 | CD164L2  | 1  | 27383379 | 27383380 | 0.080632 | rs545502   |
| ENSG00000175121.11 | WFDC5    | 20 | 45115171 | 45115172 | 0.237967 | rs6124687  |
| ENSG00000175356.12 | SCUBE2   | 11 | 9138113  | 9138114  | 0.182914 | rs1367     |
| ENSG00000175707.8  | KDF1     | 1  | 26960405 | 26960406 | 0.134591 | rs12741800 |
| ENSG00000175806.14 | MSRA     | 8  | 10054267 | 10054268 | 0.109055 | rs7824675  |
| ENSG00000176371.13 | ZSCAN2   | 15 | 84600985 | 84600986 | 0.066102 | rs12148896 |
| ENSG00000176597.11 | B3GNT5   | 3  | 1.83E+08 | 1.83E+08 | 0.059389 | rs12490878 |
| ENSG00000176920.11 | FUT2     | 19 | 48695970 | 48695971 | 0.499966 | rs10413911 |
| ENSG00000177030.16 | DEAF1    | 11 | 706593   | 706594   | 0.067065 | rs12360820 |
| ENSG00000177042.14 | TMEM80   | 11 | 695532   | 695533   | 0.567103 | rs12360820 |

|                    |          |    |          |          |          |            |
|--------------------|----------|----|----------|----------|----------|------------|
| ENSG00000177710.5  | SLC35G5  | 8  | 11330887 | 11330888 | 0.047921 | rs4370496  |
| ENSG00000178199.13 | ZC3H12D  | 6  | 1.49E+08 | 1.49E+08 | 0.095125 | rs9498368  |
| ENSG00000178462.11 | TUBAL3   | 10 | 5404829  | 5404830  | 0.168086 | rs1133654  |
| ENSG00000178764.7  | ZHX2     | 8  | 1.23E+08 | 1.23E+08 | 0.07859  | rs17344647 |
| ENSG00000178821.12 | TMEM52   | 1  | 1919272  | 1919273  | 0.224244 | rs16824588 |
| ENSG00000178927.17 | CYBC1    | 17 | 82450828 | 82450829 | 0.07757  | rs6502048  |
| ENSG00000178935.5  | ZNF552   | 19 | 57814912 | 57814913 | 0.05922  | rs34640515 |
| ENSG00000179097.5  | HTR1F    | 3  | 87990695 | 87990696 | 0.087736 | rs17025160 |
| ENSG00000179698.13 | WDR97    | 8  | 1.44E+08 | 1.44E+08 | 0.608816 | rs10100154 |
| ENSG00000180287.16 | PLD5     | 1  | 2.43E+08 | 2.43E+08 | 0.079208 | rs12139866 |
| ENSG00000180801.13 | ARSJ     | 4  | 1.14E+08 | 1.14E+08 | 0.051534 | rs2051785  |
| ENSG00000180884.9  | ZNF792   | 19 | 34964048 | 34964049 | 0.109164 | rs2546048  |
| ENSG00000180929.5  | GPR62    | 3  | 51955313 | 51955314 | 0.075933 | rs323893   |
| ENSG00000181638.17 | ZFP41    | 8  | 1.43E+08 | 1.43E+08 | 0.282935 | rs2450749  |
| ENSG00000182093.14 | GET1     | 21 | 39380243 | 39380244 | 0.34151  | rs2836778  |
| ENSG00000182134.15 | TDRKH    | 1  | 1.52E+08 | 1.52E+08 | 0.099448 | rs8688868  |
| ENSG00000182263.13 | FIGN     | 2  | 1.64E+08 | 1.64E+08 | 0.259094 | rs13415241 |
| ENSG00000182473.21 | EXOC7    | 17 | 76121575 | 76121576 | 0.095901 | rs3744033  |
| ENSG00000182511.11 | FES      | 15 | 90883694 | 90883695 | 0.158672 | rs365931   |
| ENSG00000182551.13 | ADI1     | 2  | 3517746  | 3517747  | 0.189442 | rs7562936  |
| ENSG00000183628.12 | DGCR6    | 22 | 18906027 | 18906028 | 0.376411 | rs5748167  |
| ENSG00000183741.11 | CBX6     | 22 | 38872313 | 38872314 | 0.226149 | rs5757277  |
| ENSG00000183798.4  | EMILIN3  | 20 | 41366826 | 41366827 | 0.132164 | rs6072343  |
| ENSG00000184220.11 | CMSS1    | 3  | 99817833 | 99817834 | 0.042133 | rs7619048  |
| ENSG00000184574.9  | LPAR5    | 12 | 6636446  | 6636447  | 0.043506 | rs2041375  |
| ENSG00000184584.12 | STING1   | 5  | 1.39E+08 | 1.39E+08 | 0.113146 | rs3924257  |
| ENSG00000184908.17 | CLCNKB   | 1  | 16043735 | 16043736 | 0.067462 | rs2152459  |
| ENSG00000184939.15 | ZFP90    | 16 | 68530089 | 68530090 | 0.046398 | rs1107177  |
| ENSG00000184949.15 | FAM227A  | 22 | 38656628 | 38656629 | 0.226863 | rs135721   |
| ENSG00000185038.14 | MROH2A   | 2  | 2.34E+08 | 2.34E+08 | 0.196279 | rs12472244 |
| ENSG00000185324.21 | CDK10    | 16 | 89680736 | 89680737 | 0.58631  | rs4408545  |
| ENSG00000185361.8  | TNFAIP8L | 19 | 4639517  | 4639518  | 0.073446 | rs7249758  |
| ENSG00000185627.17 | PSMD13   | 11 | 236545   | 236546   | 0.178654 | rs12360820 |
| ENSG00000185800.11 | DMWD     | 19 | 45792801 | 45792802 | 0.102626 | rs11083785 |
| ENSG00000186260.16 | MRTFB    | 16 | 14071320 | 14071321 | 0.093133 | rs30232    |
| ENSG00000186453.12 | FAM228A  | 2  | 24175068 | 24175069 | 0.274244 | rs6545264  |
| ENSG00000186501.14 | TMEM222  | 1  | 27322144 | 27322145 | 0.14947  | rs545502   |
| ENSG00000186862.17 | PDZD7    | 10 | 1.01E+08 | 1.01E+08 | 0.61137  | rs3808946  |
| ENSG00000187017.15 | ESPN     | 1  | 6424787  | 6424788  | 0.418973 | rs11121699 |
| ENSG00000187097.12 | ENTPD5   | 14 | 74019351 | 74019352 | 0.202704 | rs12717560 |
| ENSG00000187688.14 | TRPV2    | 17 | 16417561 | 16417562 | 0.169577 | rs11574935 |
| ENSG00000187730.8  | GABRD    | 1  | 2019297  | 2019298  | 0.098103 | rs16824588 |
| ENSG00000187867.8  | PALM3    | 19 | 14059158 | 14059159 | 0.078468 | rs2420543  |
| ENSG00000188157.14 | AGRN     | 1  | 1020122  | 1020123  | 0.057715 | rs2341365  |
| ENSG00000188818.12 | ZDHHC11  | 5  | 850985   | 850986   | 0.189927 | rs9800013  |
| ENSG00000188820.12 | CALHM6   | 6  | 1.16E+08 | 1.16E+08 | 0.193473 | rs9489055  |
| ENSG00000189058.8  | APOD     | 3  | 1.96E+08 | 1.96E+08 | 0.148231 | rs2259331  |
| ENSG00000189233.11 | NUGGC    | 8  | 28083870 | 28083871 | 0.056263 | rs2614053  |
| ENSG00000196116.7  | TDRD7    | 9  | 97411949 | 97411950 | 0.064138 | rs4743110  |
| ENSG00000196199.13 | MPHOSP1  | 13 | 19633680 | 19633681 | 0.116741 | rs9508901  |
| ENSG00000196247.11 | ZNF107   | 7  | 64666082 | 64666083 | 0.481623 | rs10273013 |
| ENSG00000196262.13 | PPIA     | 7  | 44796679 | 44796680 | 0.179176 | rs799434   |
| ENSG00000196418.12 | ZNF124   | 1  | 2.47E+08 | 2.47E+08 | 0.396593 | rs10924924 |
| ENSG00000196465.10 | MYL6B    | 12 | 56152255 | 56152256 | 0.094717 | rs7296038  |
| ENSG00000196497.16 | IPO4     | 14 | 24188963 | 24188964 | 0.156506 | rs12895448 |
| ENSG00000196503.3  | ARL9     | 4  | 56505208 | 56505209 | 0.102226 | rs7684910  |
| ENSG00000196576.14 | PLXNB2   | 22 | 50307626 | 50307627 | 0.137321 | rs6151425  |
| ENSG00000196660.10 | SLC30A10 | 1  | 2.2E+08  | 2.2E+08  | 0.119814 | rs6673738  |

|                    |         |    |          |          |          |            |
|--------------------|---------|----|----------|----------|----------|------------|
| ENSG00000196730.12 | DAPK1   | 9  | 87497227 | 87497228 | 0.218054 | rs913782   |
| ENSG00000196912.12 | ANKRD36 | 2  | 97589964 | 97589965 | 0.607862 | rs13008503 |
| ENSG00000197008.9  | ZNF138  | 7  | 64794387 | 64794388 | 0.187969 | rs10273013 |
| ENSG00000197056.9  | ZMYM1   | 1  | 35059785 | 35059786 | 0.144252 | rs12048974 |
| ENSG00000197245.5  | FAM110D | 1  | 26159019 | 26159020 | 0.132349 | rs2232648  |
| ENSG00000197345.12 | MRPL21  | 11 | 68903834 | 68903835 | 0.621361 | rs11228506 |
| ENSG00000197353.3  | LYPD2   | 8  | 1.43E+08 | 1.43E+08 | 0.040115 | rs6983847  |
| ENSG00000197457.9  | STMN3   | 20 | 63657681 | 63657682 | 0.121078 | rs310631   |
| ENSG00000197728.9  | RPS26   | 12 | 56041852 | 56041853 | 0.82154  | rs7296038  |
| ENSG00000198420.9  | TCAF1   | 7  | 1.44E+08 | 1.44E+08 | 0.101067 | rs2949766  |
| ENSG00000198538.10 | ZNF28   | 19 | 52821668 | 52821669 | 0.10507  | rs11882311 |
| ENSG00000198546.14 | ZNF511  | 10 | 1.33E+08 | 1.33E+08 | 0.089854 | rs4073355  |
| ENSG00000198933.9  | TBKBP1  | 17 | 47694080 | 47694081 | 0.389899 | rs1808192  |
| ENSG00000203797.9  | DDO     | 6  | 1.1E+08  | 1.1E+08  | 0.114515 | rs2428175  |
| ENSG00000203896.9  | LIME1   | 20 | 63736282 | 63736283 | 0.088128 | rs310631   |
| ENSG00000203965.12 | EFCAB7  | 1  | 63523502 | 63523503 | 0.066545 | rs7513180  |
| ENSG00000204021.3  | LIPK    | 10 | 88724543 | 88724544 | 0.169778 | rs1426618  |
| ENSG00000204514.9  | ZNF814  | 19 | 57889073 | 57889074 | 0.102835 | rs34640515 |
| ENSG00000204930.9  | FAM221B | 9  | 35828746 | 35828747 | 0.08131  | rs12726    |
| ENSG00000205129.8  | CFAP96  | 4  | 1.85E+08 | 1.85E+08 | 0.06161  | rs6815168  |
| ENSG00000205420.10 | KRT6A   | 12 | 52493256 | 52493257 | 0.031696 | rs1791643  |
| ENSG00000205531.12 | NAP1L4  | 11 | 2992376  | 2992377  | 0.201677 | rs17744036 |
| ENSG00000206561.12 | COLQ    | 3  | 15521750 | 15521751 | 0.170466 | rs2688672  |
| ENSG00000213903.8  | LTB4R   | 14 | 24313310 | 24313311 | 0.22296  | rs12896458 |
| ENSG00000213906.9  | LTB4R2  | 14 | 24309124 | 24309125 | 0.140696 | rs12896458 |
| ENSG00000213923.11 | CSNK1E  | 22 | 38318083 | 38318084 | 0.041473 | rs135721   |
| ENSG00000214253.8  | FIS1    | 7  | 1.01E+08 | 1.01E+08 | 0.352658 | rs12532732 |
| ENSG00000215817.5  | ZC3H11B | 1  | 2.2E+08  | 2.2E+08  | 0.103571 | rs1933447  |
| ENSG00000219626.8  | FAM228B | 2  | 24076525 | 24076526 | 0.175177 | rs13034826 |
| ENSG00000221890.3  | NPTXR   | 22 | 38843981 | 38843982 | 0.092698 | rs5757277  |
| ENSG00000228672.3  | PROB1   | 5  | 1.39E+08 | 1.39E+08 | 0.08884  | rs3924257  |
| ENSG00000228716.6  | DHFR    | 5  | 80654982 | 80654983 | 0.221284 | rs17259420 |
| ENSG00000234616.8  | JRK     | 8  | 1.43E+08 | 1.43E+08 | 0.157063 | rs6983847  |
| ENSG00000239704.10 | CDRT4   | 17 | 15475727 | 15475728 | 0.602609 | rs236815   |
| ENSG00000239779.6  | WBP1    | 2  | 74458328 | 74458329 | 0.074504 | rs205636   |
| ENSG00000242220.6  | TCP10L  | 21 | 32587372 | 32587373 | 0.181708 | rs2833950  |
| ENSG00000242612.6  | DECR2   | 16 | 401825   | 401826   | 0.537632 | rs9939901  |
| ENSG00000243317.7  | STMP1   | 7  | 1.36E+08 | 1.36E+08 | 0.588669 | rs7803171  |
| ENSG00000244038.9  | DDOST   | 1  | 20661543 | 20661544 | 0.099468 | rs4654861  |
| ENSG00000244607.5  | CCDC13  | 3  | 42773203 | 42773204 | 0.134781 | rs13090185 |
| ENSG00000253958.1  | CLDN23  | 8  | 8701937  | 8701938  | 0.528598 | rs6992247  |
| ENSG00000255529.7  | POLR2M  | 15 | 57706628 | 57706629 | 0.125696 | rs11854917 |
| ENSG00000257093.6  | DENND11 | 7  | 1.42E+08 | 1.42E+08 | 0.262995 | rs13236601 |
| ENSG00000265107.2  | GJA5    | 1  | 1.48E+08 | 1.48E+08 | 0.039767 | rs12754942 |
| ENSG00000272636.3  | DOC2B   | 17 | 181635   | 181636   | 0.269132 | rs4890199  |
| ENSG00000276234.4  | TADA2A  | 17 | 37406873 | 37406874 | 0.320636 | rs11651755 |
| ENSG00000277494.1  | GPIHBP1 | 8  | 1.43E+08 | 1.43E+08 | 0.174981 | rs2450749  |
| ENSG00000279170.1  | TSTD3   | 6  | 99587610 | 99587611 | 0.121519 | rs4840040  |

| BEST.GWAS.Z  | EQTL.ID   | EQTL.R2      | EQTL.Z   | EQTL.GWAS.Z  | NSNP | NWGT | MODEL |
|--------------|-----------|--------------|----------|--------------|------|------|-------|
| 2.562132882  | rs4656198 | 0.019040451  | 4.957988 | 2.191201153  | 532  | 532  | susie |
| 3.47362969   | rs1321236 | 0.013639082  | -4.3704  | 3.037030841  | 538  | 10   | enet  |
| 2.684208583  | rs6831585 | 0.053901233  | 6.399045 | -0.740534675 | 552  | 6    | lasso |
| -2.460764101 | rs3501042 | 0.012544176  | 3.834334 | -1.2761533   | 432  | 432  | susie |
| 2.691912749  | rs1044569 | 0.274319494  | -12.9322 | -2.348082015 | 566  | 5    | lasso |
| 2.552221195  | rs4803480 | 0.069005595  | -6.56082 | 2.006392908  | 316  | 1    | top1  |
| 3.395524429  | rs1086594 | 0.042533746  | 5.733414 | -2.566979688 | 379  | 1    | top1  |
| 2.897508645  | rs7659958 | 0.303238516  | -13.5846 | -2.206213895 | 512  | 512  | susie |
| 3.243191345  | rs6584306 | 0.079893897  | -7.09864 | -1.412157734 | 436  | 436  | susie |
| 2.353363995  | rs1723613 | -0.001648771 | 3.100595 | -1.108021772 | 278  | 278  | susie |
| -2.564186607 | rs1683546 | 0.035383737  | -5.57537 | -1.918253938 | 366  | 366  | susie |
| -3.004920212 | rs1074814 | 0.672975632  | -20.1772 | 2.563967026  | 560  | 7    | lasso |
| -2.693466498 | rs4491733 | 0.164624863  | -10.1066 | -2.669463625 | 526  | 1    | top1  |
| -3.314432982 | rs7520019 | 0.084305399  | 7.364213 | 2.517337872  | 426  | 3    | lasso |
| -2.712703405 | rs7584823 | 0.054131841  | 6.727026 | 2.325749525  | 591  | 591  | susie |
| -2.401058291 | rs332236  | 0.040452972  | 6.007937 | -2.381143185 | 292  | 292  | susie |
| -3.302788354 | rs957582  | 0.022652948  | 4.721334 | 0.949180073  | 410  | 410  | susie |
| -2.679154909 | rs1192001 | 0.056611088  | 6.838364 | -2.514112151 | 353  | 25   | enet  |
| -2.937259528 | rs32571   | 0.006740798  | 4.770796 | -2.110945919 | 596  | 596  | susie |
| 3.26855747   | rs7041840 | 0.07793721   | 7.407833 | -2.226980326 | 512  | 512  | susie |
| 3.067107066  | rs1195765 | 0.111973575  | 8.584361 | -2.073859773 | 561  | 561  | susie |
| -2.769338819 | rs2817864 | 0.343797017  | -14.7467 | -2.158432992 | 363  | 48   | enet  |
| -2.601945529 | rs1748436 | 0.047592891  | -6.068   | -2.138854807 | 297  | 20   | enet  |
| 2.653668879  | rs7522851 | 0.044120589  | -5.51351 | -1.991965739 | 573  | 1    | top1  |
| -2.937963062 | rs9918696 | 0.049087439  | -5.67803 | -1.292559408 | 338  | 16   | enet  |
| -3.038997151 | rs1271368 | 0.001405506  | 3.674493 | -2.078619642 | 314  | 1    | top1  |
| 3.612615064  | rs1099837 | 0.013375692  | 4.163069 | 1.764590523  | 381  | 381  | susie |
| 2.933047915  | rs1041970 | 0.204947237  | 11.17782 | -1.85829835  | 464  | 464  | susie |
| 3.19493345   | rs3800426 | 0.005293464  | 3.516511 | 0.251709416  | 369  | 369  | susie |
| -3.496476618 | rs505303  | 0.003761161  | -4.40079 | -1.697444229 | 424  | 3    | lasso |
| -2.862045239 | rs617521  | 0.012078484  | -4.5345  | -2.051577248 | 442  | 442  | susie |
| 3.415070601  | rs2744808 | 0.14537003   | -9.52743 | 2.108641906  | 423  | 1    | top1  |
| 3.086553413  | rs9800013 | 0.180207496  | 10.4671  | 3.086553413  | 326  | 73   | enet  |
| -2.559080103 | rs1556487 | 0.052827782  | -5.84917 | -1.961877123 | 370  | 1    | top1  |
| -2.562243875 | rs1693231 | 0.108381739  | -8.62395 | -1.385893654 | 362  | 17   | enet  |
| -3.314432982 | rs1204197 | 0.02593875   | -4.90123 | 3.013747636  | 423  | 10   | enet  |
| 4.024237431  | rs1019592 | 0.221609797  | -12.1361 | -0.954684944 | 450  | 450  | susie |
| -2.776633616 | rs1232477 | 0.00014559   | 4.51933  | -2.730946056 | 436  | 2    | lasso |
| 2.756488426  | rs7108861 | 0.02268987   | 5.456159 | 1.355674781  | 537  | 22   | enet  |
| 3.057463021  | rs9901146 | 0.025050938  | 5.986643 | 2.181336144  | 289  | 289  | susie |
| 2.940891315  | rs1748925 | 0.046698481  | 5.632128 | -1.294620953 | 253  | 16   | enet  |
| -2.450424736 | rs1015928 | 0.015958062  | 4.149829 | -2.196916652 | 402  | 402  | susie |
| 3.208010763  | rs490341  | 0.049444571  | -5.70412 | 2.25335536   | 612  | 612  | susie |
| 2.976672092  | rs1206029 | 0.022786065  | 4.043037 | 2.841252881  | 152  | 5    | enet  |
| -3.802416631 | rs1763781 | 0.083311823  | -7.46029 | -2.044137103 | 531  | 1    | top1  |
| 2.873315662  | rs6748349 | 0.070580094  | -7.5968  | 2.447634158  | 408  | 20   | enet  |
| 2.824681514  | rs1031381 | 0.044117349  | -6.18198 | 0.953720133  | 529  | 529  | susie |
| -2.860254709 | rs2086673 | 0.06696053   | -7.51383 | 1.287919507  | 533  | 20   | enet  |
| 2.587792686  | rs9676963 | 0.013423846  | 5.666545 | 1.647279565  | 481  | 481  | susie |
| 3.616391956  | rs920433  | 0.182669068  | 11.15771 | 2.947733219  | 348  | 21   | enet  |
| 2.988478077  | rs1247224 | 0.190949502  | 10.93958 | 2.988478077  | 751  | 9    | lasso |
| -2.875389322 | rs6088732 | 0.048309701  | -5.78278 | -2.422308056 | 339  | 1    | top1  |
| -2.204386117 | rs6058465 | 0.039286037  | 5.943841 | -1.766388319 | 310  | 8    | enet  |
| -2.749987378 | rs151511  | 0.053229615  | -6.46971 | -1.689323321 | 453  | 453  | susie |
| 3.971588212  | rs4786500 | 0.03448132   | -5.10329 | -3.036328504 | 418  | 1    | top1  |
| -2.822715041 | rs1058678 | 0.067632372  | -6.85898 | -2.822715041 | 350  | 350  | susie |

|              |           |              |          |              |     |           |
|--------------|-----------|--------------|----------|--------------|-----|-----------|
| 4.077639056  | rs6944787 | 0.011505172  | 4.18522  | 1.637032738  | 467 | 27 enet   |
| -2.401154354 | rs1073974 | 0.000518232  | 4.308653 | -2.130460918 | 320 | 320 susie |
| 3.457258545  | rs3757283 | 0.133655606  | 9.641797 | -1.557159207 | 568 | 49 enet   |
| 2.660707616  | rs1112187 | 0.12368162   | 9.149563 | 2.550870798  | 407 | 7 lasso   |
| 2.755218621  | rs2229259 | -5.35E-05    | -3.89858 | 2.342670655  | 369 | 369 susie |
| -3.927992921 | rs361727  | 0.009364878  | 4.994677 | -3.515412937 | 527 | 527 susie |
| -3.927992921 | rs5995708 | 0.070443197  | -7.10149 | -2.130912189 | 527 | 20 enet   |
| -3.927992921 | rs2266953 | -0.001585334 | -3.44529 | 0.698718199  | 406 | 406 susie |
| 2.53677555   | rs2040771 | 0.109232894  | -8.29209 | 1.979989359  | 385 | 1 top1    |
| 3.088733229  | rs12004   | 0.130351103  | 9.343609 | 2.466267941  | 365 | 4 lasso   |
| 3.088733229  | rs5750627 | 0.192483419  | -11.048  | 2.102637601  | 367 | 1 top1    |
| 3.088733229  | rs4821807 | 0.195061404  | -10.9264 | 2.058045352  | 372 | 1 top1    |
| 4.175394378  | rs132717  | 0.1603315    | -9.92656 | 3.039247659  | 488 | 488 susie |
| 3.21995924   | rs5751058 | 0.017281696  | -5.39995 | 2.582125207  | 273 | 273 susie |
| -3.023531022 | rs1710140 | -0.001658154 | -2.96606 | -0.892751664 | 344 | 26 enet   |
| -2.66921515  | rs2273154 | 0.005897171  | 4.324104 | -0.90689043  | 381 | 381 susie |
| -2.875389322 | rs6120849 | 0.089999824  | -8.89765 | -2.530156695 | 347 | 347 susie |
| -3.213172792 | rs3664    | 0.158915701  | 9.928995 | 1.755616253  | 510 | 510 susie |
| -3.334944205 | rs6075340 | 0.644952961  | 19.74499 | -2.540298806 | 616 | 616 susie |
| 2.927738715  | rs2254234 | 0.149692827  | -9.72836 | 2.603701659  | 433 | 39 enet   |
| 2.937139627  | rs2279407 | 0.229354228  | -11.8937 | -2.789765142 | 560 | 9 lasso   |
| 2.863612778  | rs1762169 | 0.002299399  | -4.08241 | -2.454193368 | 312 | 30 enet   |
| 2.863612778  | rs9931987 | 0.044207248  | 5.96928  | 2.070945619  | 292 | 292 susie |
| 3.94828485   | rs3567211 | 0.129908959  | 9.568124 | -3.033044675 | 437 | 437 susie |
| 3.202985613  | rs1041930 | 0.025513783  | -4.88199 | -1.651336537 | 453 | 12 enet   |
| -2.618248042 | rs7250780 | 0.005347245  | 4.172385 | 2.034173395  | 407 | 1 top1    |
| 2.976672092  | rs1334609 | 0.024616753  | -4.65275 | 2.939977876  | 142 | 1 top1    |
| -2.959417798 | rs6509552 | 0.191267199  | -10.9476 | 2.351572209  | 598 | 598 susie |
| 2.521751483  | rs1077444 | 0.001096829  | 4.000833 | -2.333943125 | 307 | 1 top1    |
| -2.36747776  | rs1839581 | 0.050291581  | -5.9014  | -2.284957452 | 481 | 481 susie |
| -3.811392261 | rs245873  | -0.000327106 | -3.57483 | 2.116805272  | 719 | 5 lasso   |
| 2.803962696  | rs7808669 | 0.290712727  | 13.40934 | -2.664363024 | 396 | 396 susie |
| -2.937963062 | rs2014453 | 0.065306418  | -6.42278 | 2.240538725  | 347 | 347 susie |
| -2.937963062 | rs1713607 | 0.074959358  | -6.79856 | -1.587568349 | 351 | 33 enet   |
| 2.655961264  | rs7388830 | 0.043519875  | -5.41778 | 2.223022324  | 365 | 1 top1    |
| 3.098965022  | rs7921820 | 0.024334698  | -4.84772 | 2.348474053  | 294 | 1 top1    |
| -3.239810973 | rs1770037 | 0.358536299  | -14.7875 | -2.229469804 | 550 | 550 susie |
| 3.718076143  | rs4794048 | 0.021819114  | -5.31474 | -2.618337349 | 395 | 395 susie |
| -3.461647617 | rs9890539 | 0.030372053  | 5.32782  | -1.78665672  | 292 | 292 susie |
| 2.395602577  | rs1164996 | 0.085672754  | 7.869895 | 2.323391341  | 458 | 6 lasso   |
| 2.417709787  | rs8065878 | 0.070078685  | 7.811756 | 1.449046373  | 459 | 7 enet    |
| -2.336323085 | rs7438961 | 0.024870772  | 5.103305 | 1.309343547  | 397 | 397 susie |
| 2.797526491  | rs1782105 | 0.02123767   | -5.4335  | 2.797526491  | 641 | 13 enet   |
| 2.550307783  | rs1079230 | 0.140789554  | 9.476527 | 2.088122505  | 333 | 1 top1    |
| 3.027752652  | rs367035  | 0.046174968  | -6.22289 | 1.320550061  | 482 | 14 enet   |
| 2.571941771  | rs1077018 | 0.008878345  | -4.78877 | 2.290457642  | 344 | 7 enet    |
| 2.940371986  | rs2364153 | 0.196096067  | -10.9417 | -2.023046718 | 548 | 1 top1    |
| 2.922102785  | rs2596737 | 0.045497456  | 5.763914 | 2.295825788  | 584 | 584 susie |
| 3.591329906  | rs4759793 | 0.422907067  | -16.2162 | 2.228931618  | 635 | 34 enet   |
| 2.945760539  | rs703829  | 0.00257374   | -3.53352 | -2.013582867 | 299 | 6 lasso   |
| -3.048505715 | rs1106890 | 0.059072223  | 7.003301 | -2.539623615 | 446 | 8 lasso   |
| 2.491138154  | rs4712775 | 0.030186543  | -5.62069 | 1.029000246  | 520 | 7 enet    |
| 2.91998777   | rs4945630 | 0.232440252  | -12.2522 | 1.762552489  | 417 | 4 lasso   |
| 2.904800935  | rs2064304 | 0.020320924  | 4.392466 | 2.904800935  | 466 | 466 susie |
| 3.086553413  | rs1113414 | 0.011978258  | -4.10329 | 2.849410356  | 345 | 11 enet   |
| 3.184766694  | rs335632  | 0.135234475  | 9.268247 | -2.095006875 | 514 | 6 lasso   |
| -2.955696397 | rs423906  | 0.0007135    | -3.46251 | 2.174052331  | 481 | 1 top1    |
| 2.447967094  | rs551357  | 0.002496261  | -3.9065  | 2.241945289  | 400 | 1 top1    |

|              |           |              |          |              |     |           |
|--------------|-----------|--------------|----------|--------------|-----|-----------|
| 3.152437756  | rs1685175 | 0.125397066  | 9.16126  | 2.062313767  | 387 | 7 enet    |
| 3.050783913  | rs4912517 | 0.035083971  | 6.061542 | -2.40823248  | 478 | 478 susie |
| 3.008902815  | rs2016575 | 0.02944249   | -5.46767 | 2.044882883  | 350 | 1 top1    |
| 2.641170811  | rs1189465 | 0.110818399  | 8.78485  | 2.087101723  | 168 | 3 lasso   |
| -3.078866619 | rs1700999 | 0.097011197  | -7.89609 | -2.336107554 | 336 | 1 top1    |
| 3.125087499  | rs4072149 | 0.043779855  | -5.81834 | -2.287025685 | 454 | 1 top1    |
| -2.767643859 | rs2422011 | 0.012182861  | -4.27094 | -1.823963005 | 266 | 266 susie |
| 4.024237431  | rs1866140 | 0.065018246  | -7.31028 | -1.738788436 | 466 | 5 lasso   |
| -3.496476618 | rs670439  | 0.01638739   | 4.725904 | 1.444998045  | 443 | 11 enet   |
| -2.877283881 | rs1159084 | 0.021405791  | -4.5273  | 2.547813758  | 490 | 1 top1    |
| 2.925629447  | rs3767876 | 0.134242149  | -9.29914 | -2.12333033  | 352 | 352 susie |
| -3.287974232 | rs1208212 | 0.028405542  | -6.03464 | 2.128929692  | 540 | 540 susie |
| 2.482984605  | rs3554152 | 0.02404301   | 4.677515 | 2.261482797  | 481 | 1 top1    |
| -2.522164432 | rs2255302 | 0.036514063  | -6.23402 | -1.845190439 | 505 | 505 susie |
| -3.411082096 | rs1167446 | 0.00172667   | 3.663148 | -0.670299989 | 468 | 468 susie |
| -2.604693149 | rs269782  | 0.003138998  | -3.56657 | 1.223800573  | 301 | 301 susie |
| -2.872975077 | rs801189  | 0.103007251  | 8.628846 | 2.046291038  | 347 | 347 susie |
| 2.91453841   | rs1528587 | 0.329391041  | 14.20048 | -2.375342754 | 444 | 5 lasso   |
| 3.394756607  | rs7900024 | 0.55838949   | -18.4638 | -2.716782301 | 451 | 451 susie |
| -2.565956203 | rs1682956 | 0.056842525  | 6.128823 | 2.333012004  | 501 | 1 top1    |
| 2.115924068  | rs7542337 | 0.021842044  | 5.107189 | 1.164202443  | 367 | 47 enet   |
| 3.012896314  | rs9652091 | 0.021719405  | -5.83563 | -1.611407873 | 569 | 38 enet   |
| -2.948489533 | rs2726055 | 0.056600411  | -6.09571 | 2.831027037  | 496 | 1 top1    |
| 2.833405483  | rs1693032 | 0.146539422  | -9.44973 | -1.640093361 | 570 | 31 enet   |
| 2.757793765  | rs3780804 | 0.177786668  | 10.47928 | -1.77745405  | 601 | 24 enet   |
| -3.741645182 | rs6923983 | 0.027253901  | 4.474889 | -3.082034355 | 464 | 1 top1    |
| 2.863612778  | rs3785098 | 0.023181767  | 5.024397 | 2.22363257   | 242 | 4 lasso   |
| -2.501232541 | rs4812742 | 0.18806568   | 10.91754 | 2.208652275  | 521 | 8 lasso   |
| -2.781266028 | rs311499  | 0.000535569  | 3.615378 | 2.568395007  | 428 | 3 lasso   |
| 2.774768435  | rs507905  | 0.214879508  | 11.56727 | -2.514452317 | 411 | 23 enet   |
| -2.521455525 | rs7341851 | 0.187745593  | -10.717  | 1.928987831  | 414 | 414 susie |
| -3.526254557 | rs3741605 | 0.46850172   | -16.8716 | 2.050434935  | 487 | 487 susie |
| -3.081064156 | rs3807306 | 0.210799271  | -11.3293 | -2.516447323 | 332 | 1 top1    |
| 2.650773566  | rs6973081 | 0.029456229  | -4.65348 | 1.82741458   | 169 | 4 lasso   |
| -3.081064156 | rs2307040 | 0.059626899  | 6.305534 | -2.56812086  | 341 | 1 top1    |
| 2.524116451  | rs3736290 | 0.162246801  | 10.38443 | 2.381957061  | 461 | 32 enet   |
| -2.288742196 | rs1108575 | 0.028123191  | -4.79438 | -2.08501209  | 369 | 1 top1    |
| 2.530388777  | rs8018014 | 0.038699028  | -7.13413 | 2.083013751  | 216 | 11 lasso  |
| 2.870514778  | rs1730461 | -0.000268813 | 3.22783  | 1.343895797  | 430 | 18 enet   |
| 3.384421951  | rs4437128 | 0.002656917  | -4.10343 | 2.152397982  | 422 | 27 enet   |
| 2.648585214  | rs1783289 | 0.260959677  | -12.6421 | -2.041932326 | 393 | 393 susie |
| -3.172385996 | rs1108587 | 0.086423385  | -8.07727 | -2.074416592 | 297 | 297 susie |
| -3.172385996 | rs1108589 | 0.074934412  | 8.000672 | -1.847567551 | 408 | 408 susie |
| -3.172385996 | rs8102371 | 0.016272056  | -4.25923 | -2.043467187 | 298 | 20 enet   |
| 4.024237431  | rs4569473 | 0.369343085  | 15.07674 | -1.638393468 | 445 | 27 enet   |
| 2.321155973  | rs6102356 | 0.05492787   | 6.104464 | -1.663038123 | 364 | 364 susie |
| 2.525650431  | rs4608189 | 0.026624114  | -4.68688 | -2.068666033 | 451 | 1 top1    |
| 2.395803377  | rs1171052 | 0.015280526  | 4.187952 | 2.01525519   | 550 | 1 top1    |
| -2.551371196 | rs1783195 | 0.038879078  | -5.12438 | 1.20575857   | 638 | 38 enet   |
| -3.325816003 | rs435788  | 0.087767417  | 7.679347 | -2.648487447 | 638 | 13 enet   |
| -2.92918935  | rs2123472 | 0.194830571  | 11.69962 | -2.246007707 | 560 | 26 enet   |
| 3.215023355  | rs1088147 | 0.051572429  | -5.74994 | 2.823674527  | 463 | 463 susie |
| -3.496476618 | rs4970834 | 0.006294749  | 4.745189 | -1.022533659 | 418 | 418 susie |
| 2.894694815  | rs2230274 | 0.016545244  | 4.563239 | 1.861203141  | 415 | 9 enet    |
| -2.929821212 | rs1086836 | 0.081417295  | -7.27341 | 1.582660264  | 307 | 5 lasso   |
| -3.662754304 | rs1688357 | 0.05918655   | 6.648007 | 2.519835939  | 373 | 6 lasso   |
| -2.733258219 | rs1280005 | 0.026670512  | -4.66903 | -2.498884469 | 335 | 1 top1    |
| 2.870046675  | rs9401564 | 0.11314608   | 8.407985 | 2.004348346  | 435 | 1 top1    |

|              |           |              |          |              |     |           |
|--------------|-----------|--------------|----------|--------------|-----|-----------|
| 2.904800935  | rs9321677 | 0.009757981  | -4.50658 | 1.618069866  | 460 | 13 enet   |
| -3.337476118 | rs9886056 | 0.053469108  | 5.925297 | 1.8596881    | 660 | 30 enet   |
| -2.937963062 | rs4640970 | 0.15965849   | 9.98759  | 2.738883196  | 339 | 1 top1    |
| 2.759722313  | rs1186971 | 0.016538152  | -4.73719 | -2.220498532 | 469 | 1 top1    |
| -2.987871008 | rs7950145 | 0.122968129  | 8.765404 | -2.453540463 | 433 | 1 top1    |
| -2.829213747 | rs6577150 | 0.003383744  | 4.083848 | -1.850190104 | 390 | 13 enet   |
| 3.478730579  | rs2289360 | 0.025600071  | 5.519735 | 2.601212391  | 306 | 1 top1    |
| 3.169347103  | rs2304681 | 0.452235023  | 16.57643 | 2.617920456  | 302 | 19 enet   |
| 2.485146462  | rs1693034 | 0.035783856  | 5.507359 | -2.102085218 | 211 | 1 top1    |
| 2.87913476   | rs1696241 | 0.006349787  | 3.828448 | 2.87913476   | 339 | 339 susie |
| -2.860254709 | rs7307700 | 0.063940305  | -6.53344 | 2.693926364  | 524 | 524 susie |
| 2.945760539  | rs705699  | 0.360698917  | -14.7831 | 2.33932724   | 278 | 35 enet   |
| 3.093274224  | rs1185399 | 0.061854897  | -7.04159 | 2.926512002  | 249 | 249 susie |
| -3.011514652 | rs6598484 | 0.032069007  | 4.609605 | -2.702883939 | 505 | 1 top1    |
| 3.589050283  | rs1694442 | 0.277911648  | 13.07148 | -2.126833391 | 390 | 390 susie |
| 3.589050283  | rs8033595 | 0.106505286  | -8.10746 | -2.671530636 | 429 | 14 enet   |
| 2.345209713  | rs8030250 | 0.032441344  | -6.34596 | 1.960858602  | 322 | 13 enet   |
| 3.971588212  | rs8118    | 0.220146786  | -11.8835 | -2.638571136 | 382 | 19 enet   |
| -3.244759679 | rs1085228 | 0.001073275  | -3.78767 | 2.549066535  | 395 | 395 susie |
| -3.028594479 | rs1064315 | 0.051271281  | -5.73908 | -2.367091797 | 420 | 5 lasso   |
| -4.129316909 | rs1293063 | 0.085813714  | -7.41631 | 2.509978462  | 276 | 6 lasso   |
| 3.718076143  | rs1165747 | 0.031599286  | 5.539978 | 2.159302326  | 365 | 19 enet   |
| -3.392058987 | rs919     | 0.167045425  | 10.09599 | -2.995080019 | 399 | 25 enet   |
| -2.376293392 | rs2243523 | 0.556842268  | 18.34406 | 2.204602476  | 365 | 365 susie |
| 3.057463021  | rs1215029 | 0.042986138  | 5.976572 | 2.518225896  | 319 | 319 susie |
| -3.172385996 | rs1108587 | 0.132008955  | -9.47392 | -2.074416592 | 287 | 287 susie |
| -3.172385996 | rs2242130 | 0.032892398  | -5.07839 | -2.079991869 | 285 | 25 enet   |
| 3.24104054   | rs9983923 | 0.193658813  | 10.99033 | 2.657307737  | 805 | 49 enet   |
| 3.145670362  | rs1893208 | 0.244351954  | -12.7095 | -1.270936669 | 395 | 27 enet   |
| 3.363026371  | rs1187909 | 0.04237624   | 5.459417 | 2.001271091  | 376 | 376 susie |
| 2.201430324  | rs516246  | 0.124687955  | 8.833836 | 1.955999633  | 456 | 456 susie |
| 3.94828485   | rs1166619 | 0.034380543  | 5.537316 | 2.608445366  | 439 | 439 susie |
| 3.465919312  | rs2748981 | 0.007473345  | -3.83586 | 2.559469853  | 345 | 1 top1    |
| 3.101152344  | rs1739182 | 0.550089919  | 18.33717 | 2.442103109  | 479 | 35 enet   |
| 3.30758049   | rs1079693 | 0.014208237  | -4.42876 | 2.171246997  | 410 | 12 enet   |
| 3.042244965  | rs6426329 | 0.210932223  | -11.3571 | -2.820809695 | 440 | 440 susie |
| 3.524901566  | rs7514284 | 0.25181549   | -13.1549 | 2.165722062  | 339 | 37 enet   |
| -2.744161257 | rs1246447 | 0.031888249  | -4.92844 | 1.982107678  | 313 | 1 top1    |
| 3.095735064  | rs1342734 | 0.03552649   | 4.986572 | -2.755159294 | 295 | 1 top1    |
| -3.232188723 | rs6748364 | -0.001625835 | 3.825255 | 2.286688335  | 390 | 390 susie |
| -2.550546917 | rs1533660 | 0.06498673   | -6.35792 | -2.100456275 | 404 | 1 top1    |
| -2.735493375 | rs2551642 | 0.045958285  | -6.14282 | -2.061840061 | 396 | 396 susie |
| 3.832222741  | rs1502754 | 0.047167723  | 6.893575 | -2.595304585 | 423 | 5 lasso   |
| 2.847002319  | rs1318992 | 0.290654721  | 13.28301 | -2.379551861 | 505 | 505 susie |
| 2.773816865  | rs1683989 | 0.010167381  | 4.0443   | 1.550824201  | 420 | 20 enet   |
| 2.569058403  | rs2432169 | -0.000539916 | 4.392125 | -2.111927279 | 319 | 319 susie |
| 2.569058403  | rs9327870 | 0.034155321  | 6.335285 | -0.882228433 | 306 | 22 enet   |
| 2.558928954  | rs1738428 | 0.020863294  | -4.67991 | 2.025699077  | 380 | 380 susie |
| -2.838964549 | rs3853126 | 0.071443026  | -7.25644 | 2.631501409  | 395 | 12 enet   |
| -2.872975077 | rs801183  | 0.141486543  | 9.369156 | 2.054301394  | 361 | 1 top1    |
| -3.741645182 | rs4077236 | 0.016300879  | -4.50088 | 2.534624483  | 476 | 23 enet   |
| 3.038146003  | rs1266874 | 0.067322066  | 7.265957 | 1.567198322  | 359 | 9 lasso   |
| -2.570616334 | rs1198627 | 0.001487382  | 4.039308 | -1.925689    | 289 | 289 susie |
| 2.757793765  | rs2285487 | 0.028854437  | 4.955306 | 1.887668328  | 579 | 8 lasso   |
| 3.33488346   | rs1102099 | 0.010545154  | 4.286661 | -1.977912688 | 481 | 15 enet   |
| 2.770806423  | rs1088771 | 0.21557593   | 12.48392 | -2.198604035 | 495 | 33 enet   |
| 2.972560425  | rs2867137 | 0.060072441  | 6.834686 | 1.855866699  | 489 | 47 enet   |
| 2.699954903  | rs1123738 | 0.139432625  | 9.336957 | -1.72048706  | 358 | 358 susie |

|              |           |              |          |              |     |     |       |
|--------------|-----------|--------------|----------|--------------|-----|-----|-------|
| -3.384817492 | rs4392004 | 0.07367152   | -7.36904 | 1.245913413  | 350 | 350 | susie |
| 2.904303839  | rs1007417 | 0.19044267   | -11.1177 | 2.566577121  | 278 | 19  | enet  |
| 3.363941463  | rs1773340 | 0.006072857  | 4.588085 | -3.333515739 | 562 | 562 | susie |
| -2.567049144 | rs303208  | 0.256618385  | -12.5258 | -2.34112111  | 558 | 558 | susie |
| 3.971588212  | rs4786500 | 0.233331689  | 12.009   | -3.036328504 | 416 | 15  | enet  |
| -2.567587899 | rs1299577 | 0.040243901  | -5.86998 | -2.292469478 | 193 | 5   | lasso |
| -3.551364178 | rs1203348 | 0.020018362  | 5.140435 | -1.782925877 | 517 | 517 | susie |
| -2.988198225 | rs1917344 | 0.051152377  | -7.00235 | -2.436352351 | 501 | 16  | enet  |
| 2.617812371  | rs1552019 | 0.049745819  | -6.01715 | 2.486647692  | 637 | 1   | top1  |
| -3.159793674 | rs1262726 | 0.057185101  | -7.37385 | -2.236210623 | 533 | 533 | susie |
| 2.807033188  | rs2996295 | 0.063200074  | -7.21063 | -1.442645136 | 329 | 329 | susie |
| -2.75106626  | rs517490  | 0.074380767  | 7.162916 | 2.089623773  | 500 | 500 | susie |
| 3.208867132  | rs7725846 | 0.002317583  | 3.311878 | 1.297768644  | 466 | 466 | susie |
| 3.612615064  | rs9645499 | 0.05790536   | -6.911   | 2.698761159  | 547 | 8   | enet  |
| 3.716650697  | rs2394642 | 0.071322762  | -7.05483 | 2.199104132  | 715 | 715 | susie |
| 3.247106245  | rs42637   | -0.000742073 | -3.29911 | -1.935534543 | 478 | 478 | susie |
| 3.038146003  | rs1713510 | 0.063067883  | 7.283598 | 2.112864998  | 369 | 26  | enet  |
| -2.601945529 | rs4678408 | 0.006984425  | -4.19626 | -1.027333934 | 302 | 7   | enet  |
| -2.601945529 | rs1679178 | 0.095617105  | 8.702236 | -2.046582414 | 297 | 12  | enet  |
| 3.208010763  | rs2305027 | 0.055608308  | 6.147534 | -1.643647439 | 564 | 34  | enet  |
| 3.023270027  | rs1790144 | 0.059058534  | 7.283776 | 1.669884917  | 431 | 14  | enet  |
| 2.482984605  | rs1212631 | 0.070643638  | -7.63489 | -2.094165693 | 445 | 36  | enet  |
| 2.482984605  | rs7546890 | 0.014387037  | -4.49577 | -2.339100058 | 439 | 1   | top1  |
| -4.129316909 | rs164749  | 0.10335186   | -8.50364 | 2.068006926  | 412 | 412 | susie |
| 3.718076143  | rs2074185 | 0.001648592  | 3.995183 | -0.752403181 | 382 | 35  | enet  |
| -3.180502042 | rs1265922 | -0.000862573 | 3.331239 | 2.053757752  | 385 | 385 | susie |
| -3.180502042 | rs1564508 | 0.056470447  | 7.063426 | -2.237336839 | 406 | 406 | susie |
| 3.31973695   | rs2182817 | 0.011284871  | 4.292159 | -1.394960232 | 394 | 15  | enet  |
| 4.003380125  | rs4818826 | 0.34315016   | -14.6845 | 2.40250536   | 492 | 53  | enet  |
| 4.003380125  | rs4819221 | 0.330595078  | 14.54065 | -2.048193274 | 462 | 37  | enet  |
| 3.057463021  | rs903502  | 0.116622578  | 8.792397 | 2.428572166  | 317 | 6   | lasso |
| 3.008902815  | rs323895  | 0.068808835  | -6.59171 | 3.008902735  | 246 | 1   | top1  |
| 3.465919312  | rs2503701 | 0.05126557   | 6.476211 | 1.01072741   | 370 | 30  | enet  |
| 3.524901566  | rs6426134 | 0.070371969  | -7.43474 | 2.504705182  | 348 | 7   | lasso |
| 2.684208583  | rs4076789 | 0.030570528  | 4.75557  | 2.304067588  | 488 | 1   | top1  |
| -3.411082096 | rs4670899 | 0.120046047  | -9.16277 | -2.215540477 | 294 | 9   | enet  |
| -2.735493375 | rs7584910 | 0.019326271  | 4.849895 | 2.652366663  | 396 | 4   | lasso |
| 2.899609732  | rs321623  | 0.017195479  | -4.95506 | 2.307305945  | 412 | 412 | susie |
| -3.543403456 | rs1262958 | 0.31268408   | 13.91494 | -2.842154878 | 291 | 6   | lasso |
| 3.30758049   | rs877343  | 0.043637594  | 5.322977 | 3.178328221  | 392 | 4   | lasso |
| 2.717295664  | rs7636513 | 0.060847926  | 7.693476 | -1.248153661 | 447 | 27  | enet  |
| -2.628173301 | rs1000955 | 0.012079497  | -4.50503 | 1.985807014  | 419 | 1   | top1  |
| -3.180502042 | rs6599308 | 0.319314181  | 13.95402 | 1.635925393  | 375 | 32  | enet  |
| 2.489130607  | rs1021234 | 0.084691766  | -8.31389 | 1.371669202  | 444 | 18  | enet  |
| -2.499936511 | rs1093793 | 0.091243368  | 7.54114  | 2.224733862  | 329 | 24  | enet  |
| 2.389077036  | rs6830624 | 0.310553398  | 14.26993 | 2.328666037  | 329 | 22  | enet  |
| 3.008902815  | rs6793317 | 0.092570732  | 8.215372 | 2.122128637  | 320 | 320 | susie |
| 3.184766694  | rs639342  | 0.042860492  | 5.38863  | 2.62948952   | 557 | 1   | top1  |
| -3.163024034 | rs1760363 | 0.211022629  | 11.44609 | 2.230806858  | 525 | 525 | susie |
| 3.086553413  | rs9654453 | 0.031211069  | -5.44624 | -2.69478711  | 279 | 279 | susie |
| -2.948489533 | rs6955916 | 0.443609592  | -16.4141 | -2.04890308  | 611 | 8   | lasso |
| 2.556022883  | rs302562  | 0.061315362  | 7.110934 | 1.50164458   | 525 | 17  | enet  |
| 2.765064578  | rs1027436 | 0.096095252  | -7.70386 | 2.067303485  | 390 | 1   | top1  |
| 3.116969061  | rs827588  | 0.014409539  | 4.579256 | 2.049618937  | 410 | 410 | susie |
| -2.060934615 | rs7073279 | 0.058572124  | -6.40806 | -1.735932905 | 299 | 299 | susie |
| 2.846542384  | rs3982199 | 0.027743742  | -5.06045 | -1.954179476 | 378 | 7   | lasso |
| -2.797744297 | rs3814231 | 0.327084733  | -14.1297 | -2.082594807 | 597 | 20  | enet  |
| 3.060257017  | rs1222147 | 0.086740053  | -7.3156  | 2.666969553  | 486 | 2   | lasso |

|              |           |              |          |              |     |           |
|--------------|-----------|--------------|----------|--------------|-----|-----------|
| -2.433481582 | rs2698268 | 0.085141955  | 7.701868 | -1.827712003 | 312 | 20 enet   |
| -2.715160163 | rs1088304 | 0.10377828   | -8.31435 | 2.154920411  | 519 | 519 susie |
| 3.014440908  | rs1709926 | 0.041974954  | -5.50123 | 2.632838583  | 511 | 24 enet   |
| 3.000271747  | rs1050932 | 0.034496752  | 5.818347 | 2.597985901  | 674 | 674 susie |
| -3.182229916 | rs1538677 | -0.00093481  | -4.06364 | 2.895774808  | 680 | 29 enet   |
| 2.329557149  | rs4512898 | 0.03955705   | 6.672057 | -1.659845816 | 545 | 19 enet   |
| 2.485146462  | rs1693034 | 0.407651885  | -15.7357 | -2.102085218 | 207 | 19 lasso  |
| -3.068375261 | rs2653569 | 0.044812405  | -5.79043 | 2.296756809  | 370 | 1 top1    |
| 3.884936357  | rs1216500 | 0.249969771  | -12.4115 | -2.075346781 | 601 | 22 enet   |
| -2.998727813 | rs2863674 | 0.015286479  | -4.08432 | -2.471768892 | 275 | 8 lasso   |
| 2.583154491  | rs1164594 | 0.139260451  | -9.21383 | 2.258084754  | 342 | 1 top1    |
| 2.904303839  | rs7744316 | 0.047471077  | -6.40586 | 2.5429361    | 248 | 248 susie |
| 2.717295664  | rs2070662 | 0.161350482  | -9.95647 | 2.216674895  | 427 | 29 enet   |
| 2.717295664  | rs7433237 | 0.012577282  | -4.92636 | -1.777392416 | 451 | 32 enet   |
| 3.068927185  | rs7739209 | 0.045506042  | -5.67961 | 2.464841427  | 593 | 1 top1    |
| -2.981280945 | rs4034    | 0.051352718  | -5.74168 | 2.420659368  | 318 | 1 top1    |
| -2.567131119 | rs1042296 | 0.082608992  | -7.33555 | -2.139668532 | 457 | 1 top1    |
| 4.024237431  | rs882883  | 0.002202468  | -3.59202 | 1.68007364   | 468 | 32 enet   |
| -3.102643306 | rs1758607 | 0.071026624  | -6.76797 | 2.291759814  | 465 | 1 top1    |
| -2.83045808  | rs9856468 | 0.008010956  | -4.09867 | -2.334865151 | 358 | 1 top1    |
| 3.671084715  | rs6894997 | 0.045177477  | -5.43284 | 2.464949313  | 393 | 1 top1    |
| 2.846542384  | rs1272142 | 0.21832688   | 11.90646 | -1.668513127 | 388 | 18 enet   |
| -3.457418371 | rs4504066 | 0.012522063  | 4.974016 | -1.978657159 | 497 | 497 susie |
| 2.940371986  | rs589619  | 0.012534369  | -4.38612 | -1.652149758 | 690 | 43 enet   |
| 3.371383717  | rs1124246 | 0.198438182  | 11.05482 | 3.207904638  | 269 | 1 top1    |
| -2.972406802 | rs1707790 | 0.240364086  | 12.09588 | 1.850467761  | 802 | 9 lasso   |
| 3.371383717  | rs1006394 | 0.020191209  | 4.181116 | 2.218629838  | 272 | 1 top1    |
| 3.371383717  | rs6596475 | 0.280876833  | 13.52951 | 2.541819997  | 270 | 26 enet   |
| 2.748363613  | rs764828  | 0.138344869  | 9.54145  | -2.412306467 | 468 | 4 lasso   |
| 2.98517074   | rs7721657 | 0.092569437  | 7.643078 | 2.021384823  | 682 | 1 top1    |
| -2.726614885 | rs1231227 | 0.087411548  | 7.571681 | -1.981407028 | 409 | 1 top1    |
| 2.797526491  | rs1051992 | 0.059997452  | 7.445808 | 2.148788715  | 611 | 611 susie |
| 3.94828485   | rs4804827 | 0.126394255  | 8.811383 | -3.351345034 | 444 | 54 enet   |
| 3.187563662  | rs4062178 | 0.293101538  | -13.3716 | -2.068791476 | 484 | 5 lasso   |
| 3.067107066  | rs7732198 | 0.077137498  | 7.308581 | 2.420808899  | 560 | 38 enet   |
| -3.163024034 | rs254411  | 0.030966906  | 4.62042  | 2.880297976  | 459 | 1 top1    |
| -2.908587448 | rs300240  | 0.130150208  | -9.16884 | -2.908587448 | 539 | 539 susie |
| 3.057463021  | rs7219923 | 0.091104115  | 7.598982 | 2.519509476  | 291 | 1 top1    |
| 2.848958578  | rs9959139 | 0.05983041   | 6.210485 | 1.802034946  | 404 | 18 enet   |
| 2.400215712  | rs1292313 | -0.001576818 | -3.14515 | 2.250298989  | 248 | 248 susie |
| 2.537667943  | rs4717195 | 0.031791302  | -4.56045 | -2.406636156 | 313 | 1 top1    |
| 2.587792686  | rs1047128 | 0.06031843   | 7.809095 | -1.229620478 | 465 | 13 enet   |
| 2.895876447  | rs4855885 | 0.337647443  | 14.89746 | 2.147359366  | 318 | 13 enet   |
| -2.305980254 | rs6819580 | 0.046182983  | -5.66573 | -0.482230262 | 257 | 20 enet   |
| 3.00022557   | rs1247581 | 0.083649874  | 7.31956  | -2.563696621 | 372 | 372 susie |
| 2.710151014  | rs9534140 | 0.190164358  | 11.51161 | 1.919681257  | 443 | 30 enet   |
| 2.587792686  | rs3830    | 0.153866871  | 9.799754 | -2.323151199 | 322 | 322 susie |
| 2.558750033  | rs4609871 | 0.000240053  | -3.66802 | -0.536454106 | 178 | 178 susie |
| 3.130873605  | rs1241065 | 0.010439077  | 4.35465  | -2.288798286 | 192 | 1 top1    |
| -3.098754172 | rs6130759 | 0.110726743  | -9.30167 | -2.61159505  | 465 | 19 enet   |
| -3.068375261 | rs1160412 | 0.024783351  | 5.521317 | 2.055896676  | 366 | 366 susie |
| -2.622285594 | rs3010109 | 0.083241244  | 7.577003 | 1.939994975  | 238 | 6 lasso   |
| 3.17460767   | rs4841352 | 0.049592427  | 7.00125  | -2.478026288 | 622 | 31 enet   |
| 2.693729379  | rs1107361 | 0.029459229  | 4.892341 | -1.903168509 | 325 | 325 susie |
| 2.689108747  | rs3811732 | 0.10929698   | 8.284668 | -2.337524593 | 366 | 366 susie |
| 2.201430324  | rs516246  | 0.250657487  | -12.341  | 1.955999633  | 452 | 452 susie |
| -2.982985564 | rs7935013 | 0.008264443  | 4.086349 | -2.087375571 | 472 | 472 susie |
| -2.982985564 | rs1124626 | 0.425165983  | -16.0521 | 1.928761809  | 480 | 47 enet   |

|              |           |              |          |              |     |     |       |
|--------------|-----------|--------------|----------|--------------|-----|-----|-------|
| -2.864531902 | rs2736277 | 0.008400358  | -4.40398 | 1.968366289  | 633 | 2   | lasso |
| 2.187564371  | rs1048509 | 0.062361313  | 6.775916 | 2.18747625   | 429 | 1   | top1  |
| 3.410825402  | rs4630198 | 0.075807892  | -7.74189 | 1.74598271   | 624 | 7   | lasso |
| -3.465772748 | rs1327023 | 0.044002823  | 5.53836  | -2.123322511 | 504 | 1   | top1  |
| 3.465919312  | rs2748984 | 0.21676092   | 11.67104 | -2.16242303  | 308 | 32  | enet  |
| -2.473483287 | rs9303029 | 0.051005137  | -5.75657 | 2.134092477  | 401 | 1   | top1  |
| 2.587792686  | rs2303817 | 0.062177798  | 6.323209 | 2.000915878  | 484 | 1   | top1  |
| -3.543403456 | rs4859104 | 0.020049359  | -5.45927 | -2.142413491 | 295 | 16  | enet  |
| -2.445099893 | rs1326465 | 0.278060741  | 13.01952 | -1.887591898 | 246 | 6   | lasso |
| -3.400635838 | rs1092664 | -0.001438758 | 3.398799 | -1.731694422 | 517 | 517 | susie |
| 3.31861035   | rs1250525 | 0.034270836  | -4.73981 | -2.495623216 | 359 | 1   | top1  |
| -2.567131119 | rs2651110 | 0.09859165   | 7.983115 | -2.416472942 | 459 | 3   | lasso |
| 3.008902815  | rs323879  | 0.010472746  | -4.52005 | 2.216730592  | 228 | 228 | susie |
| 2.544916521  | rs4419827 | 0.263250066  | 12.68118 | 2.280279811  | 378 | 1   | top1  |
| -3.086518374 | rs2837007 | 0.358246846  | 15.06108 | 2.170166673  | 647 | 12  | enet  |
| 2.929262658  | rs6679233 | 0.111856029  | 8.397906 | 2.913287656  | 326 | 6   | lasso |
| -2.729254155 | rs2028406 | 0.086757244  | 7.378411 | -1.980944223 | 322 | 37  | enet  |
| -2.762549459 | rs2666013 | 0.03071439   | 4.565974 | -1.899023629 | 374 | 14  | enet  |
| 3.589050283  | rs1894400 | 0.053799054  | -6.96836 | 2.661435363  | 485 | 1   | top1  |
| -2.712703405 | rs9750132 | 0.095522634  | 7.661455 | 2.51806936   | 562 | 4   | lasso |
| 2.53677555   | rs2041780 | 0.078421621  | -7.08003 | 2.014943646  | 243 | 1   | top1  |
| 2.558372021  | rs7292074 | 0.160852178  | -10.0533 | 2.191788138  | 390 | 13  | enet  |
| 2.321155973  | rs6065338 | 0.086867552  | -7.37815 | 1.826825766  | 357 | 3   | lasso |
| -2.679154909 | rs2449106 | 0.017347931  | -4.68844 | 2.091240421  | 403 | 403 | susie |
| -2.626396438 | rs2532514 | 0.007677207  | 3.806263 | -2.380111732 | 291 | 1   | top1  |
| 3.371383717  | rs7380272 | 0.077954157  | -7.18278 | 2.09604875   | 266 | 266 | susie |
| -2.773010598 | rs1805152 | 0.004882526  | -3.89398 | 1.397119427  | 370 | 370 | susie |
| -2.746728085 | rs1292517 | 0.011360855  | -4.22857 | -2.55844718  | 307 | 1   | top1  |
| 3.088733229  | rs6001173 | 0.328578268  | -14.4133 | 2.061276818  | 367 | 17  | enet  |
| 2.988478077  | rs7564261 | 0.026623347  | -5.80052 | -1.291032446 | 748 | 34  | enet  |
| -4.129316909 | rs1805008 | 0.318219833  | -13.9158 | -1.580438114 | 417 | 38  | enet  |
| 3.164924308  | rs7250560 | 0.022465348  | -4.47434 | -3.037417953 | 415 | 19  | enet  |
| -2.982985564 | rs6598060 | 0.156065751  | 9.835636 | -2.27863721  | 295 | 1   | top1  |
| 2.39567127   | rs4802276 | 0.082128498  | 7.200302 | 1.549744543  | 396 | 21  | enet  |
| -3.59986863  | rs2301215 | 0.055851667  | -6.00124 | 2.863309759  | 414 | 1   | top1  |
| -2.676990796 | rs6713263 | 0.09171157   | 7.874861 | -1.789257538 | 275 | 63  | enet  |
| 3.130873605  | rs7521203 | 0.056049773  | 6.193818 | 2.420949111  | 198 | 23  | enet  |
| 2.69413148   | rs1119080 | 0.115377285  | 8.409265 | 1.02341606   | 407 | 29  | enet  |
| 2.660707616  | rs1112187 | 0.236811163  | -12.8475 | 2.550870798  | 401 | 56  | enet  |
| -2.279831163 | rs7140189 | 0.021694541  | -6.5025  | -1.923060158 | 393 | 24  | enet  |
| -3.461647617 | rs3813769 | 0.128013053  | -8.89645 | -2.750657615 | 300 | 1   | top1  |
| 3.465919312  | rs1330334 | 0.067444757  | 6.647096 | -1.565977753 | 353 | 353 | susie |
| -3.172385996 | rs7248632 | 0.047120657  | -5.67799 | -2.074715501 | 283 | 1   | top1  |
| 2.871385358  | rs9777939 | 0.023243601  | 4.030974 | 2.065279483  | 157 | 2   | lasso |
| 3.086553413  | rs1174992 | 0.058230301  | -6.11027 | 2.880955117  | 347 | 24  | enet  |
| 2.637765166  | rs1219212 | 0.03189156   | 6.804366 | -1.356682108 | 379 | 24  | enet  |
| -2.692072677 | rs3755726 | 0.054327421  | 7.128083 | 1.838305556  | 298 | 18  | enet  |
| -2.92918935  | rs1563055 | 0.042382502  | -5.35001 | -2.330771187 | 558 | 1   | top1  |
| 2.663077204  | rs1462090 | 0.050742177  | -5.80635 | 2.286844963  | 347 | 1   | top1  |
| -2.954012984 | rs9579659 | 0.072000061  | 7.335774 | -1.615959635 | 285 | 10  | enet  |
| 2.537667943  | rs6460178 | 0.436615494  | -16.251  | 2.363822211  | 285 | 28  | enet  |
| 2.395987721  | rs4720482 | 0.09758061   | 7.968546 | 2.080261264  | 417 | 3   | lasso |
| 3.042244965  | rs4925715 | 0.329003353  | -14.1184 | 2.866387544  | 465 | 3   | lasso |
| 2.945760539  | rs2292239 | 0.016060632  | -4.17253 | 2.495786291  | 259 | 1   | top1  |
| 2.731227439  | rs2273912 | 0.01112477   | 4.886629 | 2.429875361  | 469 | 1   | top1  |
| -2.711995788 | rs6811482 | 0.041845839  | -5.38517 | 2.005065682  | 441 | 1   | top1  |
| 3.15757786   | rs3519705 | 0.056725681  | -6.03082 | -2.151150987 | 393 | 1   | top1  |
| -2.659129618 | rs4240926 | 0.071374385  | -7.05045 | 2.349399254  | 453 | 453 | susie |

|              |           |              |          |              |     |     |       |
|--------------|-----------|--------------|----------|--------------|-----|-----|-------|
| -2.995372907 | rs975256  | 0.079639537  | -7.29993 | 1.601113054  | 607 | 607 | susie |
| 2.641170811  | rs6718109 | 0.470844198  | 16.89686 | 2.210071214  | 120 | 120 | susie |
| 2.537667943  | rs6460178 | 0.105486529  | -8.53165 | 2.363822211  | 275 | 1   | top1  |
| 2.940358387  | rs6425939 | 0.043251819  | 5.79367  | 2.405376259  | 246 | 1   | top1  |
| 2.756121189  | rs3806382 | 0.063069484  | 7.049601 | 2.623196238  | 428 | 9   | lasso |
| 2.744206105  | rs636049  | 0.642049251  | -19.7244 | -2.032341155 | 416 | 8   | lasso |
| -2.698922718 | rs2572874 | 0.032918     | -5.40884 | 2.202408477  | 402 | 402 | susie |
| -2.781266028 | rs2315007 | 0.022038716  | 5.15962  | 1.783121819  | 418 | 17  | enet  |
| 2.945760539  | rs1087686 | 0.694386846  | 20.69242 | 2.549672704  | 274 | 22  | enet  |
| 2.71922945   | rs3735383 | -0.001632415 | -4.03892 | -1.836854599 | 227 | 17  | enet  |
| 2.88779042   | rs2013647 | 0.047325002  | 5.721253 | -2.019834722 | 478 | 1   | top1  |
| 3.108194513  | rs7916900 | -0.001604484 | 2.97443  | 1.456374631  | 366 | 366 | susie |
| 3.718076143  | rs2013383 | 0.412019274  | 15.90531 | 3.680974431  | 410 | 42  | enet  |
| 2.853829416  | rs3757351 | 0.066840035  | 6.5597   | -2.005203785 | 398 | 398 | susie |
| -2.781266028 | rs6011040 | 0.069971076  | 7.281061 | 2.04075222   | 426 | 10  | enet  |
| 3.101152344  | rs1088942 | 0.015594951  | -4.27284 | -2.386536592 | 485 | 21  | enet  |
| 3.428331731  | rs303508  | 0.067128871  | 7.643909 | 2.55966068   | 558 | 558 | susie |
| 2.587792686  | rs3745123 | 0.059339582  | -6.99411 | -1.980710903 | 465 | 465 | susie |
| 3.039587908  | rs2065039 | 0.06839111   | -6.87265 | 1.981044651  | 426 | 426 | susie |
| -3.80921459  | rs1443903 | 0.027006177  | -4.71376 | -3.411231397 | 551 | 1   | top1  |
| -2.972406802 | rs928995  | 0.01883899   | 4.413549 | 2.619334653  | 801 | 1   | top1  |
| 3.027752652  | rs451041  | 0.064519492  | 6.988784 | -2.311850363 | 459 | 459 | susie |
| 3.384421951  | rs905650  | 0.014610272  | -5.67408 | 2.48550686   | 379 | 44  | enet  |
| 2.569002207  | rs2281472 | 0.181187589  | -10.5353 | 2.288112147  | 477 | 1   | top1  |
| 2.569002207  | rs2281472 | 0.099789897  | -8.02673 | 2.288112147  | 473 | 1   | top1  |
| 3.088733229  | rs4821733 | -0.000375835 | 3.847955 | 0.300916905  | 351 | 19  | enet  |
| 2.803962696  | rs7808669 | 0.291234695  | -13.3785 | -2.664363024 | 394 | 394 | susie |
| 2.56960708   | rs1776023 | 0.072370699  | 6.709247 | 2.11927417   | 466 | 1   | top1  |
| 3.00022557   | rs1134516 | 0.201696184  | -11.1255 | -2.362532968 | 310 | 1   | top1  |
| 2.558372021  | rs5757312 | 0.022209061  | -5.29187 | 1.820990372  | 382 | 4   | enet  |
| 3.371383717  | rs1124246 | 0.045451842  | -6.46573 | 3.207904638  | 271 | 271 | susie |
| 2.518497028  | rs1643665 | 0.155343791  | 10.55725 | -0.859368136 | 467 | 467 | susie |
| -2.698922718 | rs4644221 | 0.092658315  | 7.958926 | -1.799557039 | 402 | 402 | susie |
| -3.094286823 | rs2938158 | 0.465513208  | -16.8511 | -2.953133208 | 399 | 20  | enet  |
| -3.078866619 | rs1700999 | 0.047492224  | -5.55672 | -2.336107554 | 335 | 4   | lasso |
| 3.001764198  | rs2236430 | 0.074739408  | -7.69446 | 2.952297738  | 464 | 7   | lasso |
| -2.675232442 | rs3743890 | 0.267389204  | 13.21697 | -1.76292733  | 372 | 372 | susie |
| -2.943501841 | rs3110823 | 0.494796371  | -17.3145 | -1.913830961 | 459 | 10  | lasso |
| -3.128836239 | rs1048977 | 0.011808312  | -4.59053 | -2.42196466  | 462 | 20  | enet  |
| 2.192395687  | rs1306157 | 0.057481651  | 6.033099 | 1.995205139  | 444 | 1   | top1  |
| 3.852924198  | rs1060106 | 0.52304736   | -17.8578 | 2.039564697  | 625 | 14  | lasso |
| 3.506507841  | rs1062707 | 0.030355843  | 5.630649 | 2.785653688  | 673 | 53  | enet  |
| -2.460764101 | rs3501042 | 0.08024326   | 8.05399  | -1.2761533   | 452 | 45  | enet  |
| 3.392752461  | rs4950485 | 0.022771024  | 4.771805 | -3.190622116 | 322 | 322 | susie |
| -2.89205019  | rs1136388 | 0.054505872  | 7.040066 | -2.691068241 | 201 | 64  | enet  |
| -3.363258381 | rs7501983 | 0.336121624  | 14.36668 | 2.275483617  | 354 | 15  | enet  |
| 2.544916521  | rs1008790 | 0.106571043  | 8.25086  | 2.24600748   | 388 | 388 | susie |
| -3.741645182 | rs2057518 | 0.081907641  | -7.33039 | 2.160794091  | 438 | 438 | susie |

| MODEL.CV.R2 | MODEL.CV.PV | TWAS.Z   | TWAS.P   | TWAS.P.FDR  |
|-------------|-------------|----------|----------|-------------|
| 0.022       | 0.00013     | 2.139782 | 0.032372 | 0.048399989 |
| 0.021       | 0.00021     | -2.40033 | 0.01638  | 0.045987737 |
| 0.11        | 6.70E-17    | -1.9955  | 0.045988 | 0.04908997  |
| 0.015       | 0.0017      | -2.0643  | 0.03899  | 0.048399989 |
| 0.28        | 1.60E-44    | 2.285096 | 0.022307 | 0.045987737 |
| 0.069       | 3.20E-11    | -2.00639 | 0.044814 | 0.04908997  |
| 0.043       | 1.80E-07    | -2.56698 | 0.010259 | 0.045987737 |
| 0.31        | 3.30E-50    | 2.517899 | 0.011806 | 0.045987737 |
| 0.083       | 3.30E-13    | 2.284811 | 0.022324 | 0.045987737 |
| 0.012       | 0.0047      | -2.34347 | 0.019105 | 0.045987737 |
| 0.048       | 3.00E-08    | 2.071566 | 0.038306 | 0.048399989 |
| 0.68        | 5.60E-150   | -2.52626 | 0.011528 | 0.045987737 |
| 0.16        | 1.30E-25    | 2.669464 | 0.007597 | 0.045987737 |
| 0.085       | 1.70E-13    | 2.489612 | 0.012788 | 0.045987737 |
| 0.06        | 6.60E-10    | 2.054146 | 0.039962 | 0.048399989 |
| 0.049       | 2.30E-08    | -2.33215 | 0.019693 | 0.045987737 |
| 0.032       | 5.80E-06    | 2.235842 | 0.025362 | 0.046986703 |
| 0.1         | 2.30E-16    | -2.02073 | 0.043308 | 0.048806525 |
| 0.015       | 0.0015      | -2.12179 | 0.033855 | 0.048399989 |
| 0.078       | 1.40E-12    | -2.17276 | 0.029798 | 0.048269918 |
| 0.12        | 2.30E-18    | -2.06578 | 0.03885  | 0.048399989 |
| 0.38        | 3.50E-64    | 2.41331  | 0.015808 | 0.045987737 |
| 0.061       | 5.00E-10    | 2.410516 | 0.01593  | 0.045987737 |
| 0.044       | 1.10E-07    | 1.991966 | 0.046375 | 0.04908997  |
| 0.051       | 1.00E-08    | 2.145726 | 0.031895 | 0.048399989 |
| 0.0014      | 0.17        | -2.07862 | 0.037652 | 0.048399989 |
| 0.019       | 0.00045     | 2.415351 | 0.01572  | 0.045987737 |
| 0.26        | 8.40E-41    | -1.99463 | 0.046084 | 0.04908997  |
| 0.018       | 0.00064     | -2.04654 | 0.040703 | 0.048399989 |
| 0.015       | 0.0015      | 2.069766 | 0.038474 | 0.048399989 |
| 0.02        | 0.00025     | 2.331139 | 0.019746 | 0.045987737 |
| 0.15        | 1.40E-22    | -2.10864 | 0.034976 | 0.048399989 |
| 0.45        | 7.90E-81    | 2.912949 | 0.00358  | 0.043782058 |
| 0.053       | 6.40E-09    | 1.961877 | 0.049777 | 0.049776792 |
| 0.16        | 1.20E-25    | 2.18794  | 0.028674 | 0.047817095 |
| 0.027       | 3.00E-05    | -2.8852  | 0.003912 | 0.043782058 |
| 0.35        | 4.10E-58    | 2.315528 | 0.020584 | 0.045987737 |
| 0.0067      | 0.024       | -2.42615 | 0.01526  | 0.045987737 |
| 0.085       | 1.30E-13    | 2.513634 | 0.011949 | 0.045987737 |
| 0.069       | 3.20E-11    | 2.681801 | 0.007323 | 0.045987737 |
| 0.069       | 3.00E-11    | -2.33397 | 0.019597 | 0.045987737 |
| 0.016       | 0.0011      | -2.18446 | 0.028928 | 0.047817095 |
| 0.061       | 3.90E-10    | -2.23752 | 0.025252 | 0.046986703 |
| 0.023       | 0.00011     | 2.534266 | 0.011268 | 0.045987737 |
| 0.083       | 2.70E-13    | 2.044137 | 0.04094  | 0.048399989 |
| 0.12        | 4.60E-18    | -2.4534  | 0.014151 | 0.045987737 |
| 0.061       | 4.80E-10    | -2.4645  | 0.01372  | 0.045987737 |
| 0.094       | 7.30E-15    | -2.03377 | 0.041975 | 0.048399989 |
| 0.029       | 1.50E-05    | 2.117383 | 0.034227 | 0.048399989 |
| 0.19        | 4.30E-29    | 2.71457  | 0.006636 | 0.045987737 |
| 0.2         | 6.30E-32    | 3.183707 | 0.001454 | 0.042284642 |
| 0.048       | 2.80E-08    | 2.422308 | 0.015422 | 0.045987737 |
| 0.053       | 6.30E-09    | -1.9765  | 0.048098 | 0.049171832 |
| 0.058       | 1.00E-09    | 2.17139  | 0.029902 | 0.048269918 |
| 0.034       | 2.50E-06    | 3.036329 | 0.002395 | 0.042284642 |
| 0.069       | 3.20E-11    | 2.822725 | 0.004762 | 0.043782058 |

|         |           |          |          |             |
|---------|-----------|----------|----------|-------------|
| 0.052   | 9.60E-09  | 2.751401 | 0.005934 | 0.045987737 |
| 0.021   | 0.00021   | -2.56503 | 0.010317 | 0.045987737 |
| 0.16    | 4.30E-25  | -2.06626 | 0.038804 | 0.048399989 |
| 0.13    | 6.10E-20  | 2.47728  | 0.013239 | 0.045987737 |
| 0.018   | 0.00047   | -2.50847 | 0.012125 | 0.045987737 |
| 0.014   | 0.0022    | -3.71211 | 0.000206 | 0.042284642 |
| 0.076   | 3.10E-12  | 2.324687 | 0.020089 | 0.045987737 |
| 0.018   | 0.00052   | -2.281   | 0.022549 | 0.045987737 |
| 0.11    | 4.20E-17  | -1.97999 | 0.047705 | 0.049171832 |
| 0.14    | 8.60E-22  | 2.290762 | 0.021977 | 0.045987737 |
| 0.19    | 4.50E-30  | -2.10264 | 0.035497 | 0.048399989 |
| 0.2     | 1.70E-30  | -2.05805 | 0.039586 | 0.048399989 |
| 0.37    | 1.90E-62  | -2.45726 | 0.014    | 0.045987737 |
| 0.029   | 1.50E-05  | -2.59743 | 0.009392 | 0.045987737 |
| 0.021   | 0.00018   | 2.121124 | 0.033911 | 0.048399989 |
| 0.037   | 1.20E-06  | -2.0388  | 0.04147  | 0.048399989 |
| 0.19    | 6.50E-29  | 2.659917 | 0.007816 | 0.045987737 |
| 0.24    | 1.50E-38  | 2.527381 | 0.011492 | 0.045987737 |
| 0.67    | 1.50E-146 | -2.33795 | 0.01939  | 0.045987737 |
| 0.17    | 7.40E-26  | -2.69409 | 0.007058 | 0.045987737 |
| 0.23    | 6.10E-37  | 2.836084 | 0.004567 | 0.043782058 |
| 0.0047  | 0.05      | 3.022552 | 0.002507 | 0.042284642 |
| 0.051   | 1.20E-08  | 2.293424 | 0.021824 | 0.045987737 |
| 0.14    | 2.40E-21  | -3.0156  | 0.002565 | 0.042284642 |
| 0.034   | 3.10E-06  | 2.160154 | 0.030761 | 0.048399989 |
| 0.0053  | 0.04      | 2.034173 | 0.041934 | 0.048399989 |
| 0.025   | 6.30E-05  | -2.93998 | 0.003282 | 0.04363604  |
| 0.21    | 1.90E-33  | -2.46915 | 0.013543 | 0.045987737 |
| 0.0011  | 0.2       | -2.33394 | 0.019599 | 0.045987737 |
| 0.05    | 1.40E-08  | 2.082604 | 0.037287 | 0.048399989 |
| 0.005   | 0.044     | -2.26679 | 0.023403 | 0.046193068 |
| 0.29    | 6.30E-48  | -2.6618  | 0.007772 | 0.045987737 |
| 0.073   | 7.40E-12  | -2.03825 | 0.041525 | 0.048399989 |
| 0.11    | 1.00E-16  | 2.195465 | 0.02813  | 0.047817095 |
| 0.044   | 1.30E-07  | -2.22302 | 0.026214 | 0.047168518 |
| 0.024   | 6.90E-05  | -2.34847 | 0.018851 | 0.045987737 |
| 0.36    | 4.50E-61  | 2.224422 | 0.02612  | 0.047168518 |
| 0.033   | 3.50E-06  | 2.813813 | 0.004896 | 0.043782058 |
| 0.033   | 3.70E-06  | -1.99445 | 0.046103 | 0.04908997  |
| 0.089   | 4.40E-14  | 2.395111 | 0.016615 | 0.045987737 |
| 0.13    | 1.00E-20  | 1.999754 | 0.045527 | 0.04908997  |
| 0.033   | 4.30E-06  | 1.975019 | 0.048266 | 0.049171832 |
| 0.049   | 2.10E-08  | -2.99363 | 0.002757 | 0.042284642 |
| 0.14    | 7.00E-22  | 2.088123 | 0.036787 | 0.048399989 |
| 0.081   | 6.40E-13  | -2.18536 | 0.028863 | 0.047817095 |
| 0.019   | 4.00E-04  | -2.35242 | 0.018652 | 0.045987737 |
| 0.2     | 1.20E-30  | 2.023047 | 0.043068 | 0.048806525 |
| 0.046   | 6.40E-08  | 2.413939 | 0.015781 | 0.045987737 |
| 0.49    | 1.70E-90  | -2.08956 | 0.036657 | 0.048399989 |
| 0.0097  | 0.0088    | 2.231655 | 0.025638 | 0.046986703 |
| 0.071   | 1.80E-11  | -2.45177 | 0.014215 | 0.045987737 |
| 0.035   | 2.00E-06  | -1.97694 | 0.048048 | 0.049171832 |
| 0.26    | 1.10E-40  | -2.06209 | 0.039199 | 0.048399989 |
| 0.022   | 0.00017   | 2.919818 | 0.003502 | 0.043782058 |
| 0.019   | 4.00E-04  | -2.18707 | 0.028738 | 0.047817095 |
| 0.15    | 4.60E-23  | -2.08148 | 0.03739  | 0.048399989 |
| 0.00071 | 0.23      | -2.17405 | 0.029701 | 0.048269918 |
| 0.0025  | 0.11      | -2.24195 | 0.024965 | 0.046986703 |

|         |           |          |          |             |
|---------|-----------|----------|----------|-------------|
| 0.14    | 6.60E-22  | 2.118702 | 0.034116 | 0.048399989 |
| 0.093   | 8.90E-15  | -2.52849 | 0.011455 | 0.045987737 |
| 0.029   | 1.30E-05  | -2.04488 | 0.040866 | 0.048399989 |
| 0.11    | 6.50E-18  | 2.146639 | 0.031822 | 0.048399989 |
| 0.097   | 2.70E-15  | 2.336108 | 0.019486 | 0.045987737 |
| 0.044   | 1.20E-07  | 2.287026 | 0.022194 | 0.045987737 |
| 0.02    | 3.00E-04  | 2.12808  | 0.03333  | 0.048399989 |
| 0.1     | 5.50E-16  | 2.085566 | 0.037018 | 0.048399989 |
| 0.031   | 8.50E-06  | 2.591663 | 0.009551 | 0.045987737 |
| 0.021   | 0.00018   | -2.54781 | 0.01084  | 0.045987737 |
| 0.14    | 3.90E-21  | 2.130885 | 0.033099 | 0.048399989 |
| 0.085   | 1.50E-13  | -2.08473 | 0.037093 | 0.048399989 |
| 0.024   | 7.60E-05  | 2.261483 | 0.023729 | 0.046231372 |
| 0.11    | 6.40E-18  | 2.316572 | 0.020527 | 0.045987737 |
| 0.019   | 0.00044   | -2.26926 | 0.023252 | 0.046193068 |
| 0.0078  | 0.017     | -2.00454 | 0.045012 | 0.04908997  |
| 0.12    | 2.50E-18  | 2.087251 | 0.036865 | 0.048399989 |
| 0.35    | 1.20E-57  | -2.04501 | 0.040854 | 0.048399989 |
| 0.56    | 6.20E-110 | 2.569754 | 0.010177 | 0.045987737 |
| 0.057   | 1.70E-09  | 2.333012 | 0.019648 | 0.045987737 |
| 0.067   | 5.40E-11  | 2.253139 | 0.02425  | 0.046643274 |
| 0.05    | 1.40E-08  | 2.529803 | 0.011413 | 0.045987737 |
| 0.057   | 1.90E-09  | -2.83103 | 0.00464  | 0.043782058 |
| 0.19    | 3.00E-30  | 2.648341 | 0.008089 | 0.045987737 |
| 0.18    | 8.40E-28  | -2.10255 | 0.035505 | 0.048399989 |
| 0.027   | 2.70E-05  | -3.08203 | 0.002056 | 0.042284642 |
| 0.025   | 5.00E-05  | 2.275648 | 0.022867 | 0.046066253 |
| 0.19    | 1.10E-29  | 2.215701 | 0.026712 | 0.047168518 |
| 0.0033  | 0.084     | 2.425244 | 0.015298 | 0.045987737 |
| 0.22    | 1.90E-35  | -2.5933  | 0.009506 | 0.045987737 |
| 0.25    | 1.10E-39  | -2.18427 | 0.028943 | 0.047817095 |
| 0.47    | 3.70E-85  | -2.05043 | 0.040322 | 0.048399989 |
| 0.21    | 4.30E-33  | 2.516447 | 0.011854 | 0.045987737 |
| 0.046   | 6.90E-08  | -2.4439  | 0.014529 | 0.045987737 |
| 0.06    | 6.90E-10  | -2.56812 | 0.010225 | 0.045987737 |
| 0.26    | 2.10E-41  | 2.375009 | 0.017549 | 0.045987737 |
| 0.028   | 2.00E-05  | 2.085012 | 0.037068 | 0.048399989 |
| 0.066   | 9.20E-11  | -2.31445 | 0.020643 | 0.045987737 |
| 0.00051 | 0.25      | 3.2595   | 0.001116 | 0.042284642 |
| 0.004   | 0.065     | -3.20015 | 0.001374 | 0.042284642 |
| 0.26    | 5.80E-42  | 2.041932 | 0.041158 | 0.048399989 |
| 0.099   | 1.30E-15  | 2.08044  | 0.037485 | 0.048399989 |
| 0.14    | 2.10E-21  | -2.04669 | 0.040689 | 0.048399989 |
| 0.019   | 0.00037   | 2.271646 | 0.023108 | 0.046193068 |
| 0.38    | 4.50E-65  | -2.20902 | 0.027173 | 0.047421781 |
| 0.064   | 1.80E-10  | -2.00887 | 0.044551 | 0.04908997  |
| 0.027   | 3.30E-05  | 2.068666 | 0.038577 | 0.048399989 |
| 0.015   | 0.0013    | 2.015255 | 0.043878 | 0.049006347 |
| 0.051   | 1.20E-08  | -1.96804 | 0.049063 | 0.049171832 |
| 0.099   | 1.30E-15  | -2.10698 | 0.035119 | 0.048399989 |
| 0.26    | 9.80E-41  | -2.46393 | 0.013742 | 0.045987737 |
| 0.061   | 4.50E-10  | -1.99221 | 0.046348 | 0.04908997  |
| 0.04    | 4.50E-07  | -2.03773 | 0.041577 | 0.048399989 |
| 0.02    | 0.00033   | 2.186669 | 0.028767 | 0.047817095 |
| 0.098   | 1.70E-15  | -2.08069 | 0.037462 | 0.048399989 |
| 0.067   | 5.40E-11  | 2.232751 | 0.025565 | 0.046986703 |
| 0.027   | 3.20E-05  | 2.498884 | 0.012458 | 0.045987737 |
| 0.11    | 1.10E-17  | 2.004348 | 0.045033 | 0.04908997  |

|        |           |          |          |             |
|--------|-----------|----------|----------|-------------|
| 0.016  | 0.00092   | -1.97803 | 0.047925 | 0.049171832 |
| 0.091  | 1.80E-14  | 4.078295 | 4.54E-05 | 0.0205208   |
| 0.16   | 8.10E-25  | 2.738883 | 0.006165 | 0.045987737 |
| 0.017  | 0.00089   | 2.220499 | 0.026385 | 0.047168518 |
| 0.12   | 3.60E-19  | -2.45354 | 0.014146 | 0.045987737 |
| 0.015  | 0.0016    | -2.23492 | 0.025423 | 0.046986703 |
| 0.026  | 4.60E-05  | 2.601212 | 0.009289 | 0.045987737 |
| 0.47   | 2.90E-84  | 2.595438 | 0.009447 | 0.045987737 |
| 0.036  | 1.70E-06  | -2.10209 | 0.035546 | 0.048399989 |
| 0.02   | 0.00026   | 2.126885 | 0.03343  | 0.048399989 |
| 0.065  | 1.20E-10  | -2.81835 | 0.004827 | 0.043782058 |
| 0.37   | 3.00E-63  | -2.19392 | 0.028241 | 0.047817095 |
| 0.073  | 9.30E-12  | -2.3858  | 0.017042 | 0.045987737 |
| 0.032  | 5.60E-06  | -2.70288 | 0.006874 | 0.045987737 |
| 0.4    | 4.30E-70  | -3.43909 | 0.000584 | 0.042284642 |
| 0.12   | 2.60E-18  | 3.469626 | 0.000521 | 0.042284642 |
| 0.04   | 4.60E-07  | -2.2515  | 0.024354 | 0.046644178 |
| 0.26   | 1.50E-41  | 2.307868 | 0.021006 | 0.045987737 |
| 0.023  | 0.00011   | -2.48868 | 0.012822 | 0.045987737 |
| 0.059  | 7.90E-10  | 1.971539 | 0.048662 | 0.049171832 |
| 0.12   | 5.10E-19  | -2.67762 | 0.007415 | 0.045987737 |
| 0.048  | 2.90E-08  | 2.81092  | 0.00494  | 0.043782058 |
| 0.18   | 1.10E-28  | -3.2593  | 0.001117 | 0.042284642 |
| 0.63   | 4.50E-131 | 2.334997 | 0.019544 | 0.045987737 |
| 0.052  | 9.50E-09  | 2.544386 | 0.010947 | 0.045987737 |
| 0.16   | 6.30E-25  | 2.262171 | 0.023687 | 0.046231372 |
| 0.046  | 6.20E-08  | 2.233942 | 0.025487 | 0.046986703 |
| 0.26   | 2.40E-41  | 2.483511 | 0.013009 | 0.045987737 |
| 0.32   | 3.70E-52  | 2.161308 | 0.030672 | 0.048399989 |
| 0.077  | 2.10E-12  | 2.042965 | 0.041056 | 0.048399989 |
| 0.16   | 1.60E-24  | 1.96977  | 0.048865 | 0.049171832 |
| 0.035  | 2.10E-06  | 2.491008 | 0.012738 | 0.045987737 |
| 0.0075 | 0.019     | -2.55947 | 0.010483 | 0.045987737 |
| 0.56   | 5.50E-110 | 2.508345 | 0.01213  | 0.045987737 |
| 0.045  | 8.30E-08  | -2.75621 | 0.005848 | 0.045987737 |
| 0.24   | 1.10E-38  | 2.264383 | 0.023551 | 0.046231372 |
| 0.31   | 1.10E-50  | -2.33016 | 0.019798 | 0.045987737 |
| 0.032  | 5.90E-06  | -1.98211 | 0.047467 | 0.049171832 |
| 0.036  | 1.80E-06  | -2.75516 | 0.005866 | 0.045987737 |
| 0.0052 | 0.042     | 2.316998 | 0.020504 | 0.045987737 |
| 0.065  | 1.20E-10  | 2.100456 | 0.035689 | 0.048399989 |
| 0.051  | 1.30E-08  | 2.075357 | 0.037953 | 0.048399989 |
| 0.062  | 2.90E-10  | -3.0976  | 0.001951 | 0.042284642 |
| 0.3    | 5.10E-48  | -2.22265 | 0.026239 | 0.047168518 |
| 0.015  | 0.0016    | 2.46322  | 0.01377  | 0.045987737 |
| 0.0069 | 0.023     | -1.97954 | 0.047756 | 0.049171832 |
| 0.062  | 3.70E-10  | -2.11499 | 0.034431 | 0.048399989 |
| 0.023  | 9.80E-05  | -2.03448 | 0.041904 | 0.048399989 |
| 0.079  | 1.00E-12  | -1.97125 | 0.048695 | 0.049171832 |
| 0.14   | 5.50E-22  | 2.054301 | 0.039947 | 0.048399989 |
| 0.027  | 2.60E-05  | -2.4664  | 0.013648 | 0.045987737 |
| 0.14   | 5.00E-22  | 2.086995 | 0.036889 | 0.048399989 |
| 0.0093 | 0.0099    | -1.97168 | 0.048646 | 0.049171832 |
| 0.036  | 1.40E-06  | 2.200299 | 0.027786 | 0.047817095 |
| 0.017  | 0.00067   | -2.44358 | 0.014543 | 0.045987737 |
| 0.28   | 2.00E-44  | -2.25513 | 0.024125 | 0.046600387 |
| 0.068  | 4.10E-11  | 2.969089 | 0.002987 | 0.042284642 |
| 0.15   | 1.90E-23  | -2.27458 | 0.022931 | 0.046066253 |

|         |          |          |          |             |
|---------|----------|----------|----------|-------------|
| 0.15    | 1.40E-22 | -2.35415 | 0.018565 | 0.045987737 |
| 0.2     | 1.00E-31 | -2.4425  | 0.014586 | 0.045987737 |
| 0.046   | 6.30E-08 | -2.40006 | 0.016393 | 0.045987737 |
| 0.29    | 2.00E-46 | 2.321605 | 0.020254 | 0.045987737 |
| 0.25    | 1.20E-40 | -3.03857 | 0.002377 | 0.042284642 |
| 0.075   | 4.40E-12 | 2.7893   | 0.005282 | 0.045914603 |
| 0.051   | 1.20E-08 | -2.30625 | 0.021097 | 0.045987737 |
| 0.071   | 1.60E-11 | 2.418995 | 0.015563 | 0.045987737 |
| 0.05    | 1.80E-08 | -2.48665 | 0.012895 | 0.045987737 |
| 0.11    | 1.00E-16 | 2.492255 | 0.012693 | 0.045987737 |
| 0.098   | 2.10E-15 | 2.320167 | 0.020332 | 0.045987737 |
| 0.077   | 2.00E-12 | 2.010533 | 0.044375 | 0.04908997  |
| 0.012   | 0.0045   | 2.448722 | 0.014336 | 0.045987737 |
| 0.077   | 2.10E-12 | -1.99256 | 0.046309 | 0.04908997  |
| 0.076   | 3.40E-12 | -2.30891 | 0.020948 | 0.045987737 |
| 0.00077 | 0.23     | 2.488148 | 0.012841 | 0.045987737 |
| 0.1     | 1.90E-16 | 2.591478 | 0.009556 | 0.045987737 |
| 0.013   | 0.0025   | 2.031647 | 0.042189 | 0.048399989 |
| 0.16    | 1.70E-25 | -2.28705 | 0.022193 | 0.045987737 |
| 0.086   | 1.10E-13 | -2.32765 | 0.01993  | 0.045987737 |
| 0.075   | 5.10E-12 | 2.18367  | 0.028986 | 0.047817095 |
| 0.12    | 3.80E-19 | 2.888269 | 0.003874 | 0.043782058 |
| 0.014   | 0.0018   | 2.3391   | 0.01933  | 0.045987737 |
| 0.11    | 1.40E-16 | -1.99387 | 0.046167 | 0.04908997  |
| 0.038   | 7.70E-07 | -2.08967 | 0.036647 | 0.048399989 |
| 0.0022  | 0.13     | 1.980375 | 0.047661 | 0.049171832 |
| 0.064   | 1.40E-10 | -2.09961 | 0.035763 | 0.048399989 |
| 0.027   | 3.10E-05 | -1.96833 | 0.04903  | 0.049171832 |
| 0.49    | 1.70E-91 | -2.05961 | 0.039435 | 0.048399989 |
| 0.43    | 5.50E-77 | -3.06187 | 0.0022   | 0.042284642 |
| 0.12    | 4.20E-19 | 2.605394 | 0.009177 | 0.045987737 |
| 0.069   | 3.40E-11 | -3.0089  | 0.002622 | 0.042284642 |
| 0.24    | 1.50E-37 | 2.445765 | 0.014455 | 0.045987737 |
| 0.09    | 3.20E-14 | -2.94053 | 0.003277 | 0.04363604  |
| 0.031   | 9.00E-06 | 2.304068 | 0.021219 | 0.045987737 |
| 0.13    | 5.40E-20 | 2.268448 | 0.023302 | 0.046193068 |
| 0.021   | 0.00022  | 2.231072 | 0.025676 | 0.046986703 |
| 0.026   | 3.70E-05 | -2.36324 | 0.018116 | 0.045987737 |
| 0.32    | 1.50E-53 | -2.97725 | 0.002908 | 0.042284642 |
| 0.045   | 8.50E-08 | 3.284248 | 0.001023 | 0.042284642 |
| 0.14    | 4.60E-22 | -2.14984 | 0.031568 | 0.048399989 |
| 0.012   | 0.0039   | -1.98581 | 0.047055 | 0.049171832 |
| 0.42    | 2.50E-73 | 2.216543 | 0.026654 | 0.047168518 |
| 0.098   | 1.80E-15 | -2.14609 | 0.031866 | 0.048399989 |
| 0.12    | 5.70E-19 | 2.575843 | 0.01     | 0.045987737 |
| 0.46    | 2.80E-83 | 2.102836 | 0.03548  | 0.048399989 |
| 0.1     | 4.90E-16 | 2.091723 | 0.036463 | 0.048399989 |
| 0.043   | 1.70E-07 | 2.62949  | 0.008551 | 0.045987737 |
| 0.38    | 7.00E-64 | 2.4      | 0.016395 | 0.045987737 |
| 0.042   | 2.60E-07 | 2.552072 | 0.010708 | 0.045987737 |
| 0.45    | 2.20E-79 | 2.031941 | 0.04216  | 0.048399989 |
| 0.068   | 4.20E-11 | 2.144918 | 0.031959 | 0.048399989 |
| 0.096   | 3.70E-15 | -2.0673  | 0.038706 | 0.048399989 |
| 0.018   | 5.00E-04 | 3.123647 | 0.001786 | 0.042284642 |
| 0.061   | 5.00E-10 | 2.001127 | 0.045379 | 0.04908997  |
| 0.051   | 1.20E-08 | 2.08026  | 0.037502 | 0.048399989 |
| 0.42    | 1.00E-72 | 2.812533 | 0.004915 | 0.043782058 |
| 0.09    | 2.60E-14 | -2.60099 | 0.009296 | 0.045987737 |

|        |          |          |          |             |
|--------|----------|----------|----------|-------------|
| 0.091  | 2.30E-14 | -1.98474 | 0.047173 | 0.049171832 |
| 0.11   | 1.40E-16 | -2.09117 | 0.036513 | 0.048399989 |
| 0.042  | 2.00E-07 | -2.08618 | 0.036962 | 0.048399989 |
| 0.11   | 7.30E-17 | 2.210718 | 0.027055 | 0.047421781 |
| 0.012  | 0.0036   | -2.4424  | 0.01459  | 0.045987737 |
| 0.14   | 5.20E-21 | -2.41084 | 0.015916 | 0.045987737 |
| 0.42   | 3.80E-73 | 2.102061 | 0.035548 | 0.048399989 |
| 0.045  | 8.80E-08 | -2.29676 | 0.021633 | 0.045987737 |
| 0.27   | 1.70E-43 | 2.135988 | 0.03268  | 0.048399989 |
| 0.017  | 8.00E-04 | 2.645637 | 0.008154 | 0.045987737 |
| 0.14   | 1.20E-21 | -2.25808 | 0.02394  | 0.046442274 |
| 0.054  | 3.90E-09 | -2.86135 | 0.004218 | 0.043782058 |
| 0.17   | 5.00E-27 | -2.05499 | 0.03988  | 0.048399989 |
| 0.039  | 6.00E-07 | 2.019767 | 0.043408 | 0.048806525 |
| 0.046  | 7.00E-08 | -2.46484 | 0.013707 | 0.045987737 |
| 0.051  | 1.00E-08 | -2.42066 | 0.015492 | 0.045987737 |
| 0.083  | 3.40E-13 | 2.139669 | 0.032382 | 0.048399989 |
| 0.0067 | 0.024    | -2.05812 | 0.039579 | 0.048399989 |
| 0.071  | 1.60E-11 | -2.29176 | 0.02192  | 0.045987737 |
| 0.008  | 0.016    | 2.334865 | 0.01955  | 0.045987737 |
| 0.045  | 7.80E-08 | -2.46495 | 0.013703 | 0.045987737 |
| 0.25   | 3.90E-39 | -1.99336 | 0.046222 | 0.04908997  |
| 0.024  | 6.90E-05 | -2.02787 | 0.042574 | 0.0485943   |
| 0.014  | 0.0019   | 2.216918 | 0.026629 | 0.047168518 |
| 0.2    | 4.80E-31 | 3.207905 | 0.001337 | 0.042284642 |
| 0.25   | 3.10E-40 | 2.015856 | 0.043815 | 0.049006347 |
| 0.02   | 0.00027  | 2.21863  | 0.026512 | 0.047168518 |
| 0.34   | 2.00E-56 | 2.889083 | 0.003864 | 0.043782058 |
| 0.15   | 1.70E-23 | -2.30599 | 0.021111 | 0.045987737 |
| 0.093  | 1.20E-14 | 2.021385 | 0.04324  | 0.048806525 |
| 0.087  | 6.90E-14 | -1.98141 | 0.047546 | 0.049171832 |
| 0.075  | 3.90E-12 | 2.000119 | 0.045487 | 0.04908997  |
| 0.13   | 6.40E-20 | -2.59907 | 0.009348 | 0.045987737 |
| 0.31   | 4.60E-50 | 2.049315 | 0.040431 | 0.048399989 |
| 0.13   | 1.10E-20 | 1.968369 | 0.049026 | 0.049171832 |
| 0.031  | 7.90E-06 | 2.880298 | 0.003973 | 0.043782058 |
| 0.13   | 1.10E-20 | 2.342248 | 0.019168 | 0.045987737 |
| 0.091  | 2.00E-14 | 2.519509 | 0.011752 | 0.045987737 |
| 0.081  | 6.60E-13 | 2.034969 | 0.041854 | 0.048399989 |
| 0.0027 | 0.1      | -2.14932 | 0.031609 | 0.048399989 |
| 0.032  | 6.10E-06 | 2.406636 | 0.0161   | 0.045987737 |
| 0.11   | 6.20E-18 | -2.24291 | 0.024903 | 0.046986703 |
| 0.36   | 1.20E-61 | 2.113456 | 0.034562 | 0.048399989 |
| 0.071  | 1.90E-11 | -1.99397 | 0.046156 | 0.04908997  |
| 0.085  | 1.60E-13 | -2.74568 | 0.006039 | 0.045987737 |
| 0.24   | 3.30E-37 | 2.332832 | 0.019657 | 0.045987737 |
| 0.16   | 1.80E-25 | -2.06974 | 0.038476 | 0.048399989 |
| 0.0072 | 0.021    | 1.975625 | 0.048197 | 0.049171832 |
| 0.01   | 0.0068   | -2.2888  | 0.022091 | 0.045987737 |
| 0.19   | 1.80E-29 | 2.621447 | 0.008756 | 0.045987737 |
| 0.066  | 9.20E-11 | 2.148359 | 0.031685 | 0.048399989 |
| 0.1    | 8.80E-16 | 2.338493 | 0.019362 | 0.045987737 |
| 0.085  | 1.60E-13 | -2.12525 | 0.033566 | 0.048399989 |
| 0.033  | 4.00E-06 | -2.18115 | 0.029172 | 0.047948814 |
| 0.11   | 3.00E-17 | -2.33752 | 0.019412 | 0.045987737 |
| 0.33   | 3.50E-55 | -3.10581 | 0.001898 | 0.042284642 |
| 0.014  | 0.002    | -2.15556 | 0.031118 | 0.048399989 |
| 0.47   | 4.80E-86 | -2.21566 | 0.026715 | 0.047168518 |

|        |          |          |          |             |
|--------|----------|----------|----------|-------------|
| 0.023  | 0.00012  | -2.10639 | 0.03517  | 0.048399989 |
| 0.062  | 2.80E-10 | 2.187476 | 0.028708 | 0.047817095 |
| 0.13   | 3.60E-20 | -1.98434 | 0.047218 | 0.049171832 |
| 0.044  | 1.10E-07 | -2.12332 | 0.033727 | 0.048399989 |
| 0.24   | 1.70E-37 | -2.4581  | 0.013967 | 0.045987737 |
| 0.051  | 1.20E-08 | -2.13409 | 0.032835 | 0.048399989 |
| 0.062  | 3.00E-10 | 2.000916 | 0.045401 | 0.04908997  |
| 0.046  | 6.30E-08 | 2.564233 | 0.01034  | 0.045987737 |
| 0.35   | 7.80E-59 | -2.07644 | 0.037853 | 0.048399989 |
| 0.0018 | 0.15     | -2.49678 | 0.012533 | 0.045987737 |
| 0.034  | 2.70E-06 | 2.495623 | 0.012574 | 0.045987737 |
| 0.099  | 1.50E-15 | -2.325   | 0.020072 | 0.045987737 |
| 0.02   | 0.00031  | -2.43209 | 0.015012 | 0.045987737 |
| 0.26   | 3.80E-42 | 2.28028  | 0.022591 | 0.045987737 |
| 0.37   | 1.70E-63 | 2.080577 | 0.037473 | 0.048399989 |
| 0.12   | 1.80E-19 | 3.012065 | 0.002595 | 0.042284642 |
| 0.11   | 2.70E-17 | -2.23674 | 0.025303 | 0.046986703 |
| 0.033  | 3.80E-06 | -1.98517 | 0.047126 | 0.049171832 |
| 0.054  | 4.70E-09 | -2.66144 | 0.007781 | 0.045987737 |
| 0.097  | 2.80E-15 | 2.387789 | 0.01695  | 0.045987737 |
| 0.078  | 1.40E-12 | -2.01494 | 0.043911 | 0.049006347 |
| 0.18   | 9.80E-29 | -2.42972 | 0.01511  | 0.045987737 |
| 0.094  | 6.50E-15 | -2.12118 | 0.033907 | 0.048399989 |
| 0.021  | 0.00022  | -2.1615  | 0.030656 | 0.048399989 |
| 0.0077 | 0.018    | -2.38011 | 0.017307 | 0.045987737 |
| 0.078  | 1.40E-12 | -2.07647 | 0.037851 | 0.048399989 |
| 0.0061 | 0.031    | -2.12331 | 0.033728 | 0.048399989 |
| 0.011  | 0.005    | 2.558447 | 0.010514 | 0.045987737 |
| 0.35   | 1.40E-58 | -2.05729 | 0.039658 | 0.048399989 |
| 0.094  | 8.80E-15 | 2.15019  | 0.03154  | 0.048399989 |
| 0.45   | 1.80E-80 | 2.453398 | 0.014151 | 0.045987737 |
| 0.037  | 1.20E-06 | 2.058751 | 0.039518 | 0.048399989 |
| 0.16   | 3.00E-24 | -2.27864 | 0.022689 | 0.045987737 |
| 0.085  | 1.70E-13 | 2.115415 | 0.034395 | 0.048399989 |
| 0.056  | 2.40E-09 | -2.86331 | 0.004192 | 0.043782058 |
| 0.15   | 8.80E-24 | -2.04573 | 0.040783 | 0.048399989 |
| 0.066  | 8.40E-11 | 2.112812 | 0.034617 | 0.048399989 |
| 0.31   | 5.80E-51 | 2.023747 | 0.042996 | 0.048806525 |
| 0.33   | 2.20E-55 | -2.36407 | 0.018075 | 0.045987737 |
| 0.12   | 2.70E-18 | 2.038879 | 0.041462 | 0.048399989 |
| 0.13   | 6.30E-20 | 2.750658 | 0.005948 | 0.045987737 |
| 0.068  | 4.50E-11 | -1.99273 | 0.046291 | 0.04908997  |
| 0.047  | 4.10E-08 | 2.074716 | 0.038013 | 0.048399989 |
| 0.026  | 3.60E-05 | 2.201458 | 0.027704 | 0.047817095 |
| 0.084  | 2.30E-13 | -2.36255 | 0.01815  | 0.045987737 |
| 0.12   | 2.10E-18 | -2.24931 | 0.024493 | 0.046711463 |
| 0.089  | 4.30E-14 | 2.405337 | 0.016158 | 0.045987737 |
| 0.042  | 1.90E-07 | 2.330771 | 0.019765 | 0.045987737 |
| 0.051  | 1.30E-08 | -2.28684 | 0.022205 | 0.045987737 |
| 0.086  | 1.10E-13 | -2.18762 | 0.028697 | 0.047817095 |
| 0.45   | 6.80E-80 | -2.83165 | 0.004631 | 0.043782058 |
| 0.11   | 1.70E-16 | 2.108257 | 0.035009 | 0.048399989 |
| 0.33   | 1.90E-55 | -2.96839 | 0.002994 | 0.042284642 |
| 0.016  | 0.001    | -2.49579 | 0.012568 | 0.045987737 |
| 0.011  | 0.0054   | 2.429875 | 0.015104 | 0.045987737 |
| 0.042  | 2.30E-07 | -2.00507 | 0.044956 | 0.04908997  |
| 0.057  | 1.80E-09 | 2.151151 | 0.031464 | 0.048399989 |
| 0.087  | 8.10E-14 | -2.31444 | 0.020643 | 0.045987737 |

|         |           |          |          |             |
|---------|-----------|----------|----------|-------------|
| 0.092   | 1.40E-14  | -2.41308 | 0.015818 | 0.045987737 |
| 0.51    | 9.20E-97  | 2.535458 | 0.01123  | 0.045987737 |
| 0.11    | 1.50E-16  | -2.36382 | 0.018087 | 0.045987737 |
| 0.043   | 1.50E-07  | 2.405376 | 0.016156 | 0.045987737 |
| 0.069   | 3.00E-11  | 2.283797 | 0.022383 | 0.045987737 |
| 0.64    | 1.90E-137 | 2.045419 | 0.040814 | 0.048399989 |
| 0.036   | 1.80E-06  | -2.08787 | 0.03681  | 0.048399989 |
| 0.04    | 4.80E-07  | 2.850164 | 0.00437  | 0.043782058 |
| 0.8     | 1.50E-213 | 2.410503 | 0.015931 | 0.045987737 |
| 0.00075 | 0.23      | 2.738117 | 0.006179 | 0.045987737 |
| 0.047   | 3.90E-08  | -2.01983 | 0.043401 | 0.048806525 |
| 0.0049  | 0.047     | 2.154924 | 0.031168 | 0.048399989 |
| 0.43    | 2.30E-75  | 3.148608 | 0.001641 | 0.042284642 |
| 0.069   | 3.40E-11  | -1.96961 | 0.048883 | 0.049171832 |
| 0.073   | 7.90E-12  | 2.203817 | 0.027537 | 0.047817095 |
| 0.028   | 2.20E-05  | 2.141107 | 0.032265 | 0.048399989 |
| 0.11    | 1.00E-17  | 3.08413  | 0.002041 | 0.042284642 |
| 0.072   | 9.90E-12  | 2.072926 | 0.038179 | 0.048399989 |
| 0.07    | 2.60E-11  | -1.97343 | 0.048447 | 0.049171832 |
| 0.027   | 2.90E-05  | 3.411231 | 0.000647 | 0.042284642 |
| 0.019   | 0.00042   | 2.619335 | 0.00881  | 0.045987737 |
| 0.11    | 9.70E-17  | -2.19513 | 0.028154 | 0.047817095 |
| 0.098   | 1.90E-15  | -2.37134 | 0.017724 | 0.045987737 |
| 0.18    | 3.10E-28  | -2.28811 | 0.022131 | 0.045987737 |
| 0.1     | 1.00E-15  | -2.28811 | 0.022131 | 0.045987737 |
| 0.0097  | 0.0087    | -2.10187 | 0.035565 | 0.048399989 |
| 0.3     | 1.40E-48  | 2.656609 | 0.007893 | 0.045987737 |
| 0.072   | 1.00E-11  | 2.119274 | 0.034067 | 0.048399989 |
| 0.2     | 1.40E-31  | 2.362533 | 0.018151 | 0.045987737 |
| 0.035   | 2.10E-06  | -2.02919 | 0.042439 | 0.048563335 |
| 0.055   | 3.50E-09  | -2.64751 | 0.008109 | 0.045987737 |
| 0.26    | 4.30E-41  | -2.20926 | 0.027156 | 0.047421781 |
| 0.14    | 5.10E-22  | -2.17231 | 0.029832 | 0.048269918 |
| 0.54    | 9.90E-105 | 2.173994 | 0.029706 | 0.048269918 |
| 0.053   | 6.80E-09  | 2.090514 | 0.036572 | 0.048399989 |
| 0.14    | 1.40E-21  | -3.28597 | 0.001016 | 0.042284642 |
| 0.44    | 3.10E-77  | -2.77889 | 0.005455 | 0.045987737 |
| 0.52    | 2.00E-99  | 1.995516 | 0.045987 | 0.04908997  |
| 0.019   | 0.00046   | 2.128856 | 0.033266 | 0.048399989 |
| 0.057   | 1.40E-09  | 1.995205 | 0.046021 | 0.04908997  |
| 0.54    | 3.30E-103 | -2.05242 | 0.040128 | 0.048399989 |
| 0.057   | 1.50E-09  | 3.57487  | 0.00035  | 0.042284642 |
| 0.14    | 2.90E-22  | -2.09879 | 0.035835 | 0.048399989 |
| 0.023   | 1.00E-04  | -3.13672 | 0.001709 | 0.042284642 |
| 0.11    | 6.30E-18  | -3.13986 | 0.00169  | 0.042284642 |
| 0.36    | 6.00E-60  | 2.40761  | 0.016057 | 0.045987737 |
| 0.14    | 2.60E-21  | 2.053836 | 0.039992 | 0.048399989 |
| 0.087   | 7.90E-14  | -1.9779  | 0.04794  | 0.049171832 |

Table S3. Conditional and joint analysis

| ID      | TWAS.Z | TWAS.P  | JOINT.BETA | JOINT.BETA.SE | JOINT.Z | JOINT.P | COND.BETA |
|---------|--------|---------|------------|---------------|---------|---------|-----------|
| USP40   | 3.18   | 0.00145 | 3.18       | 1             | 3.18    | 0.00145 | NA        |
| ARSJ    | 2.5    | 0.0126  | 2.5        | 1             | 2.5     | 0.0126  | NA        |
| APOL4   | -2.46  | 0.014   | -2.46      | 1             | -2.46   | 0.014   | NA        |
| MED15   | 2.32   | 0.0201  | 2.32       | 1             | 2.32    | 0.0201  | NA        |
| POLR1A  | 2.32   | 0.02058 | NA         | NA            | NA      | NA      | 2.32      |
| MAPRE3  | 2.71   | 0.00664 | NA         | NA            | NA      | NA      | 2.71      |
| INO80B  | 2.34   | 0.01949 | NA         | NA            | NA      | NA      | 2.34      |
| OTX1    | 2.13   | 0.03333 | NA         | NA            | NA      | NA      | 2.13      |
| IMMT    | -2.21  | 0.02717 | NA         | NA            | NA      | NA      | -2.21     |
| CGREF1  | 2.6    | 0.00929 | NA         | NA            | NA      | NA      | 2.6       |
| KHK     | 2.6    | 0.00945 | NA         | NA            | NA      | NA      | 2.6       |
| GALNT13 | 2.32   | 0.0205  | NA         | NA            | NA      | NA      | 2.32      |
| FAM228B | 2.36   | 0.01815 | NA         | NA            | NA      | NA      | 2.36      |
| UVSSA   | 2.22   | 0.0267  | NA         | NA            | NA      | NA      | 2.22      |

| COND.BETA.SE | COND.Z | COND.P  |
|--------------|--------|---------|
| NA           | NA     | NA      |
| 1            | 2.32   | 0.02058 |
| 1            | 2.71   | 0.00664 |
| 1            | 2.34   | 0.01949 |
| 1            | 2.13   | 0.03333 |
| 1            | -2.21  | 0.02717 |
| 1            | 2.6    | 0.00929 |
| 1            | 2.6    | 0.00945 |
| 1            | 2.32   | 0.0205  |
| 1            | 2.36   | 0.01815 |
| 1            | 2.22   | 0.0267  |

Table S4. SMR analysis results

| probeID  | ProbeChr | Gene  | Probe_bp | topSNP    | topSNP_chr | topSNP_b | A1 | A2 |
|----------|----------|-------|----------|-----------|------------|----------|----|----|
| ENSG000C | 22       | APOL4 | 36585172 | rs132717  | 22         | 36596652 | T  | C  |
| ENSG000C | 2        | USP40 | 2.34E+08 | rs6219277 | 2          | 2.34E+08 | A  | G  |
| ENSG000C | 22       | MED15 | 20850200 | rs1170462 | 22         | 20889104 | C  | T  |

| Freq     | b_GWAS   | se_GWAS  | p_GWAS   | b_eQTL   | se_eQTL  | p_eQTL   | b_SMR    | se_SMR   |
|----------|----------|----------|----------|----------|----------|----------|----------|----------|
| 0.409543 | 0.211552 | 0.069607 | 2.37E-03 | -0.52443 | 0.048298 | 1.83E-27 | -0.4034  | 0.137831 |
| 0.149105 | 0.313366 | 0.100584 | 1.84E-03 | 0.501154 | 0.035972 | 4.07E-44 | 0.625289 | 0.205662 |
| 0.159046 | -0.18362 | 0.086163 | 3.31E-02 | -0.17647 | 0.023284 | 3.47E-14 | 1.04047  | 0.507183 |

| p_SMR    | p_SMR_fdr | p_HEIDI  | nsnp_HEIDI | OR(95%CI)           |
|----------|-----------|----------|------------|---------------------|
| 3.43E-03 | 5.15E-03  | 6.63E-02 | 20         | 0.668 (0.510-0.875) |
| 2.36E-03 | 5.15E-03  | 8.11E-01 | 20         | 1.87 (1.25- 2.80)   |
| 4.02E-02 | 4.02E-02  | 2.06E-01 | 17         | 2.83(1.05-7.65)     |
